# Supplementary material for: Correlation Between Genetic Abnormalities in Induced Pluripotent Stem Cell-Derivatives and Abnormal Tissue Formation in Tumorigenicity Tests
Source: PubMed Central journal article supplement (PMC9154342; doi:10.1093/stcltm/szac014), 2022-04-21
Supplement: szac014_suppl_supplementary_figures.pdf [file szac014_suppl_supplementary_figures.pdf]

# Fig. S1

## A iPSC clones with genomic mutations in the Census database and Shibata's list.

|                                                                                                |              |                 |                 |              |                   |
|------------------------------------------------------------------------------------------------|--------------|-----------------|-----------------|--------------|-------------------|
| ESC/iPSCs maintained in the undifferentiated state with Stemfit AK02N on iMatrix-coated dishes | ESC H9       | 16E84           | 16E85           | 16H12        | 15M38             |
| Passage number at FBRI                                                                         | P39          | P28             | P25             | P10          | P13               |
| Original iPSC clones Origin of cell                                                            |              | QHJI01s01 PBMCs | QHJI01s01 PBMCs | DRXT22 PBMCs | YZWJ24 Cord Blood |
| Doubling time (n = 4)                                                                          | 23.0 ± 1.5 h | 27.8 ± 3.8 h    | 27.9 ± 4.0 h    | 21.7 ± 1.2 h | 31.0 ± 4.3 h      |

## B HE staining of transplant of H9-non RPEs, 16E84-non RPEs, 16H12-non RPEs and 15M38-non RPEs.

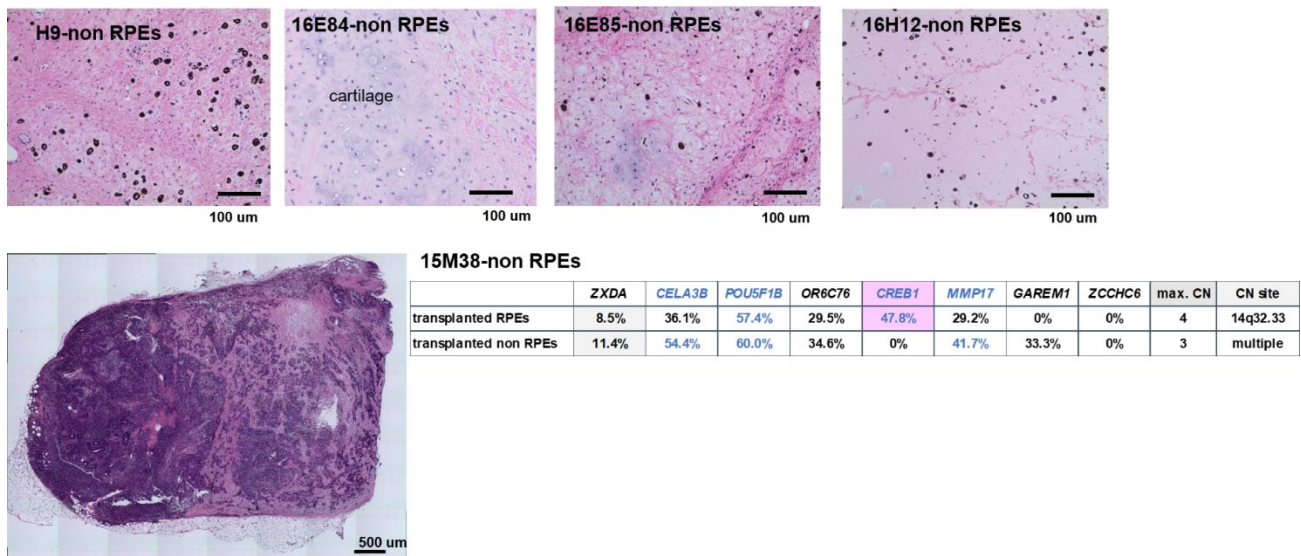

## C HE staining of transplants of H9, 16E84, 16E85, 16H12, 15M38 in cardiomyocyte lineage

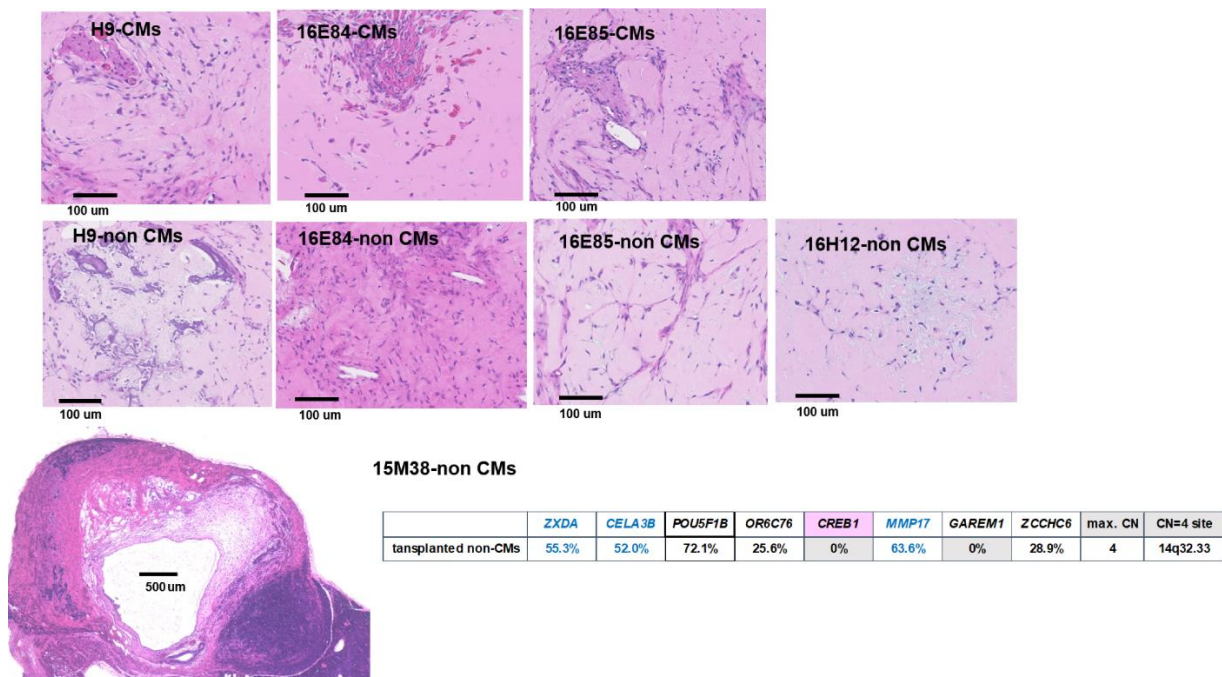

**D** Genomic- and qRT-PCR detection of plasmid and POU5F1, POU5F1B and NANOG expression.

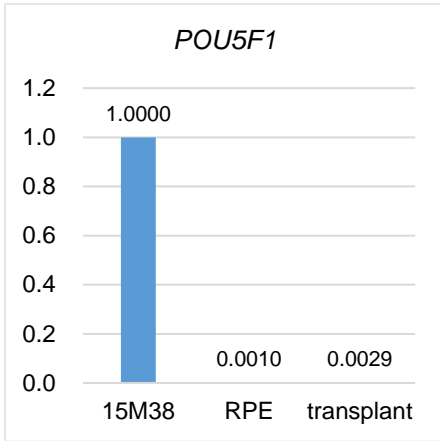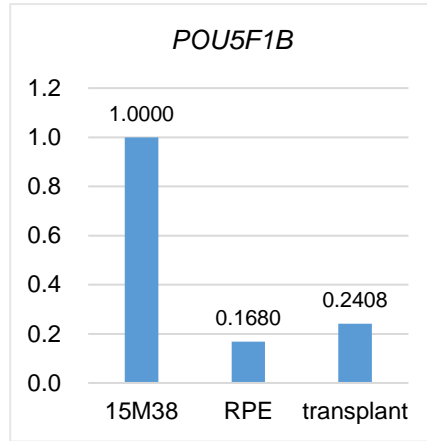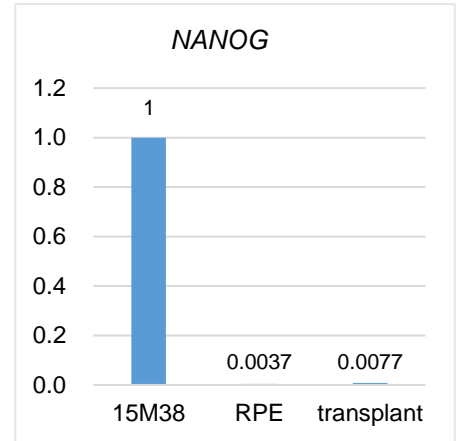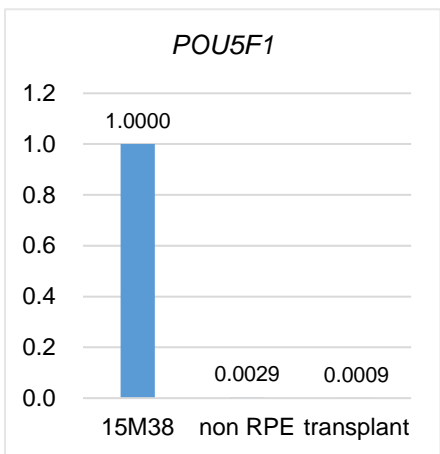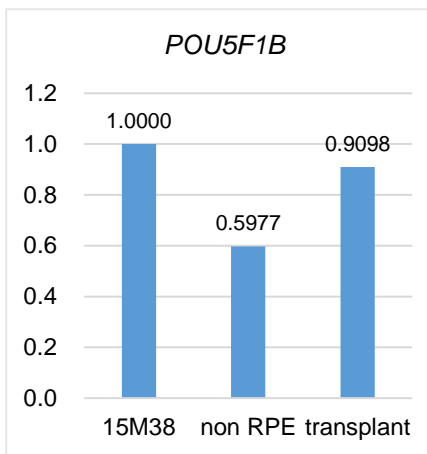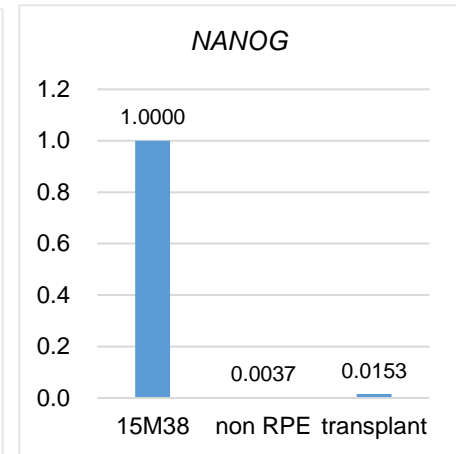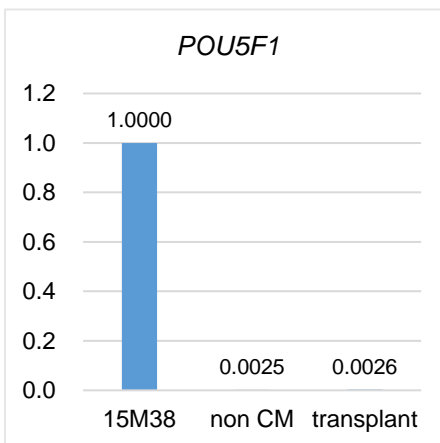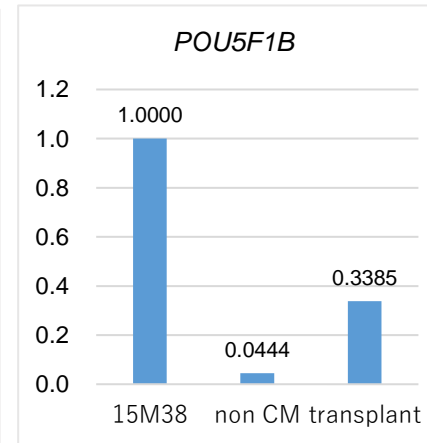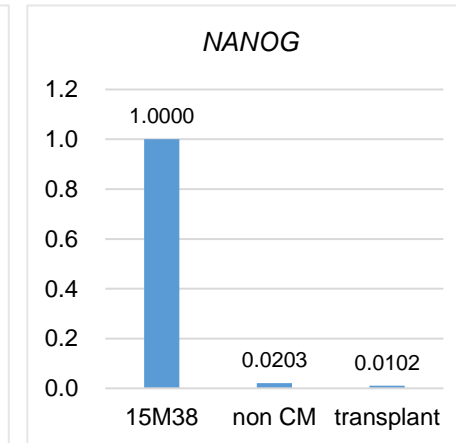

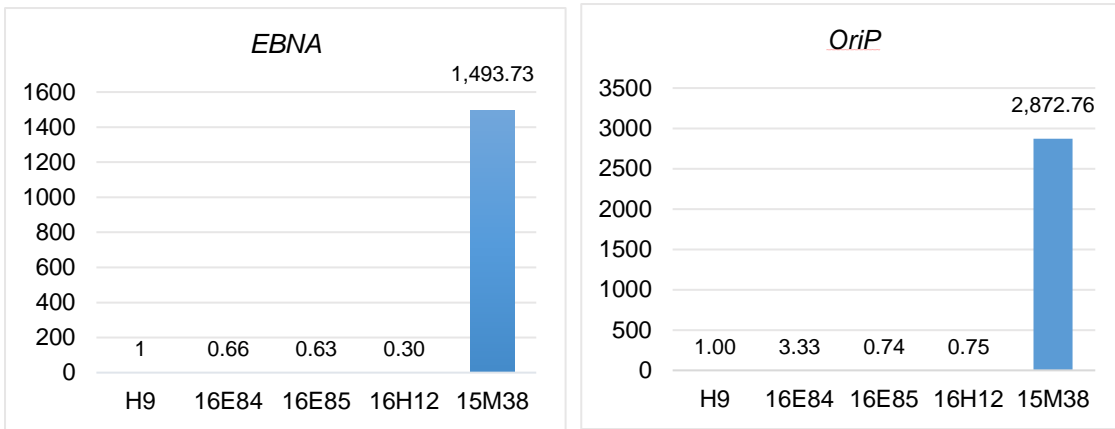

### Genome PCR Primer

| Gene        | F/ R | seq (5'-3')                |
|-------------|------|----------------------------|
| <i>Orip</i> | F    | TTC CAC GAG GGT AGT GAA CC |
| <i>Orip</i> | R    | TCG GGG GTG TTA GAG ACA AC |

| Gene         | Assay ID      |
|--------------|---------------|
| <i>GAPDH</i> | GPH1002905(-) |

### qPCR Primers

| Gene         | F/ R | seq (5'-3')                 |
|--------------|------|-----------------------------|
| <i>EBNA</i>  | F    | TAT GAC AAA GCC CGC TCC TAC |
| <i>EBNA</i>  | R    | TCA CCC TCA TCT CCA TCA CC  |
| <i>GAPDH</i> | F    | CCA CTC CTC CAC CTT TGA CG  |
| <i>GAPDH</i> | R    | ATG AGG TCC ACC ACC CTG TT  |

### Taq man PCR Primers

| Gene           | Taqman Probe  |
|----------------|---------------|
| <i>POU5F1</i>  | Hs04260367_gH |
| <i>POU5F1B</i> | Hs04995079_g1 |
| <i>NANOG</i>   | Hs02387400_g1 |
| <i>GAPDH</i>   | Hs02786624_g1 |

## E HE staining of transplants of Ff-I01-RPE or Ff-I01-NSC and VAFs of relevant transplants by WGS.

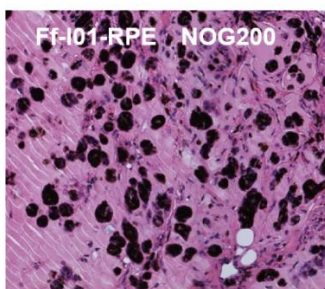

| NOG 200     |              |              |              |               |              |                |               |              |        |
|-------------|--------------|--------------|--------------|---------------|--------------|----------------|---------------|--------------|--------|
| <i>SVIL</i> | <i>PTPN5</i> | <i>NPHS1</i> | <i>EXOC2</i> | <i>RANBP9</i> | <i>GDPD2</i> | <i>C7orf72</i> | <i>POU2F1</i> | <i>CCNT2</i> | Max.CN |
| 38.8%       | 64.7%        | 62.2%        | 48.5%        | 3.0%          | 100.0%       | 41.7%          | 21.3%         | 3.8%         | 3      |

NOG 200 is ID for engrafted mouse.

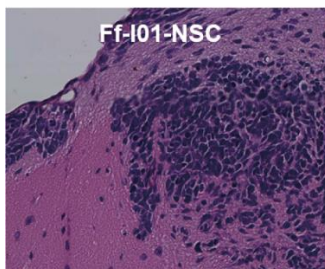

| Primary culture of grafts from Ff-I01-NSC with DMEM_F12 p3 |              |              |              |                |               |               |
|------------------------------------------------------------|--------------|--------------|--------------|----------------|---------------|---------------|
| <i>PTPN5</i>                                               | <i>NPHS1</i> | <i>EXOC2</i> | <i>GDPD2</i> | <i>C7orf72</i> | <i>POU2F1</i> | <i>GRIN2A</i> |
| 42.1%                                                      | 48.0%        | 50.0%        | 95.5%        | 40.0%          | 1.5%          | 4.7%          |

| Primary culture of grafts from Ff-I01-NSC with DMEM_F12 p8 |              |              |              |                |               |               |
|------------------------------------------------------------|--------------|--------------|--------------|----------------|---------------|---------------|
| <i>PTPN5</i>                                               | <i>NPHS1</i> | <i>EXOC2</i> | <i>GDPD2</i> | <i>C7orf72</i> | <i>POU2F1</i> | <i>GRIN2A</i> |
| 47.1%                                                      | 65.2%        | 48.6%        | 90.9%        | 45.7%          | 0.0%          | 0.0%          |

**F** Transition of genetic instability of Ff-I01-RPE or Ff-I01-NSC and VAFs of relevant transplants by WGS.

| Test      | Item       | Ff-I01 NSCs           |                    |                                    |                              |
|-----------|------------|-----------------------|--------------------|------------------------------------|------------------------------|
|           |            | P3 end                | P5 end             | P10                                | After transplantation        |
| Karyotype | Chromosome | 46[50]                | 44[1]/46[48]/47[1] | 45[3]/46[37]/47[8]/<br>49[1]/55[1] | 46[9]/48[11]                 |
|           | G-band     | 46,XY[22]<br>(SCA[3]) | 46,XY[28] (SCA[1]) | 46,XY[16]<br>47,XY,+11[7]          | 46,XY[5]/<br>48, XY,+2,+8[3] |

| Ff-I01-NSCs in culture p10 (without transplantation) |              |              |              |                |               |                |
|------------------------------------------------------|--------------|--------------|--------------|----------------|---------------|----------------|
| <i>PTPN5</i>                                         | <i>NPHS1</i> | <i>EXOC2</i> | <i>GDPD2</i> | <i>C7orf72</i> | <i>GRIN2A</i> | <i>POU5F1B</i> |
| 42.9%                                                | 41.8%        | 37.7%        | 79.3%        | 37.7%          | 3.8%          | 28.6%          |

Fig. S1. A: Morphology of iPSC clones with genomic mutations in the Census database and Shibata's list. B: HE staining of transplanted H9-non RPEs, 16E84-non RPEs, 16H12-non RPEs, and 15M38-non RPEs. Genes listed in the Census database and Shibata's List from hg19/ver88 with VAF (%) values above the detection limit (24%) are highlighted in pink, and those below the detection limit are indicated in gray. VAFs of autosomal dominant genes reaching approximately 50% are shown in blue, indicating the clonality of the cells in the transplant. C: HE staining of transplants of H9, 16E84, 16E85, 16H12, and 15M38 in the cardiomyocyte lineage. Genes listed in the Census database and Shibata's List from hg19/ver88 are highlighted in pink. VAFs below the detection limit are highlighted in gray. VAFs of autosomal genes reaching approximately 50% are shown in blue, indicating the clonality of the cells in the transplant. D: Genomic-PCR and qRT-PCR detection of plasmid expression and *POU5F1*, *POU5F1B*, and *NANOG* expression. E: HE staining of transplants of Ff-I01-RPEs or Ff-I01-NSCs and VAFs of relevant transplants, as determined by WGS. Genes listed in the Census database and Shibata's List from hg19/ver88 are highlighted in pink. VAFs below the detection limit are highlighted in gray. VAFs of autosomal genes reaching around 50% or those of sex chromosomal genes reaching 100% are displayed in blue to show the clonality of cells in the transplant. F: Transition of the genetic instability of Ff-I01-RPEs or Ff-I01-NSCs and VAFs of relevant transplants by WGS. Karyotyping of Ff-I01-NSCs at p10 in culture (without transplantation). Genes listed in the Census database and Shibata's List from hg19/ver88 are highlighted in pink. VAFs below the limit of detection (24%) are shown in gray. VAFs of autosomal genes reaching approximately 50% are displayed in blue, indicating the clonality of the cells in the transplant.

**Fig. S2**

The detection limit (LOD) and decision limit for VAF determined by WGS and WES

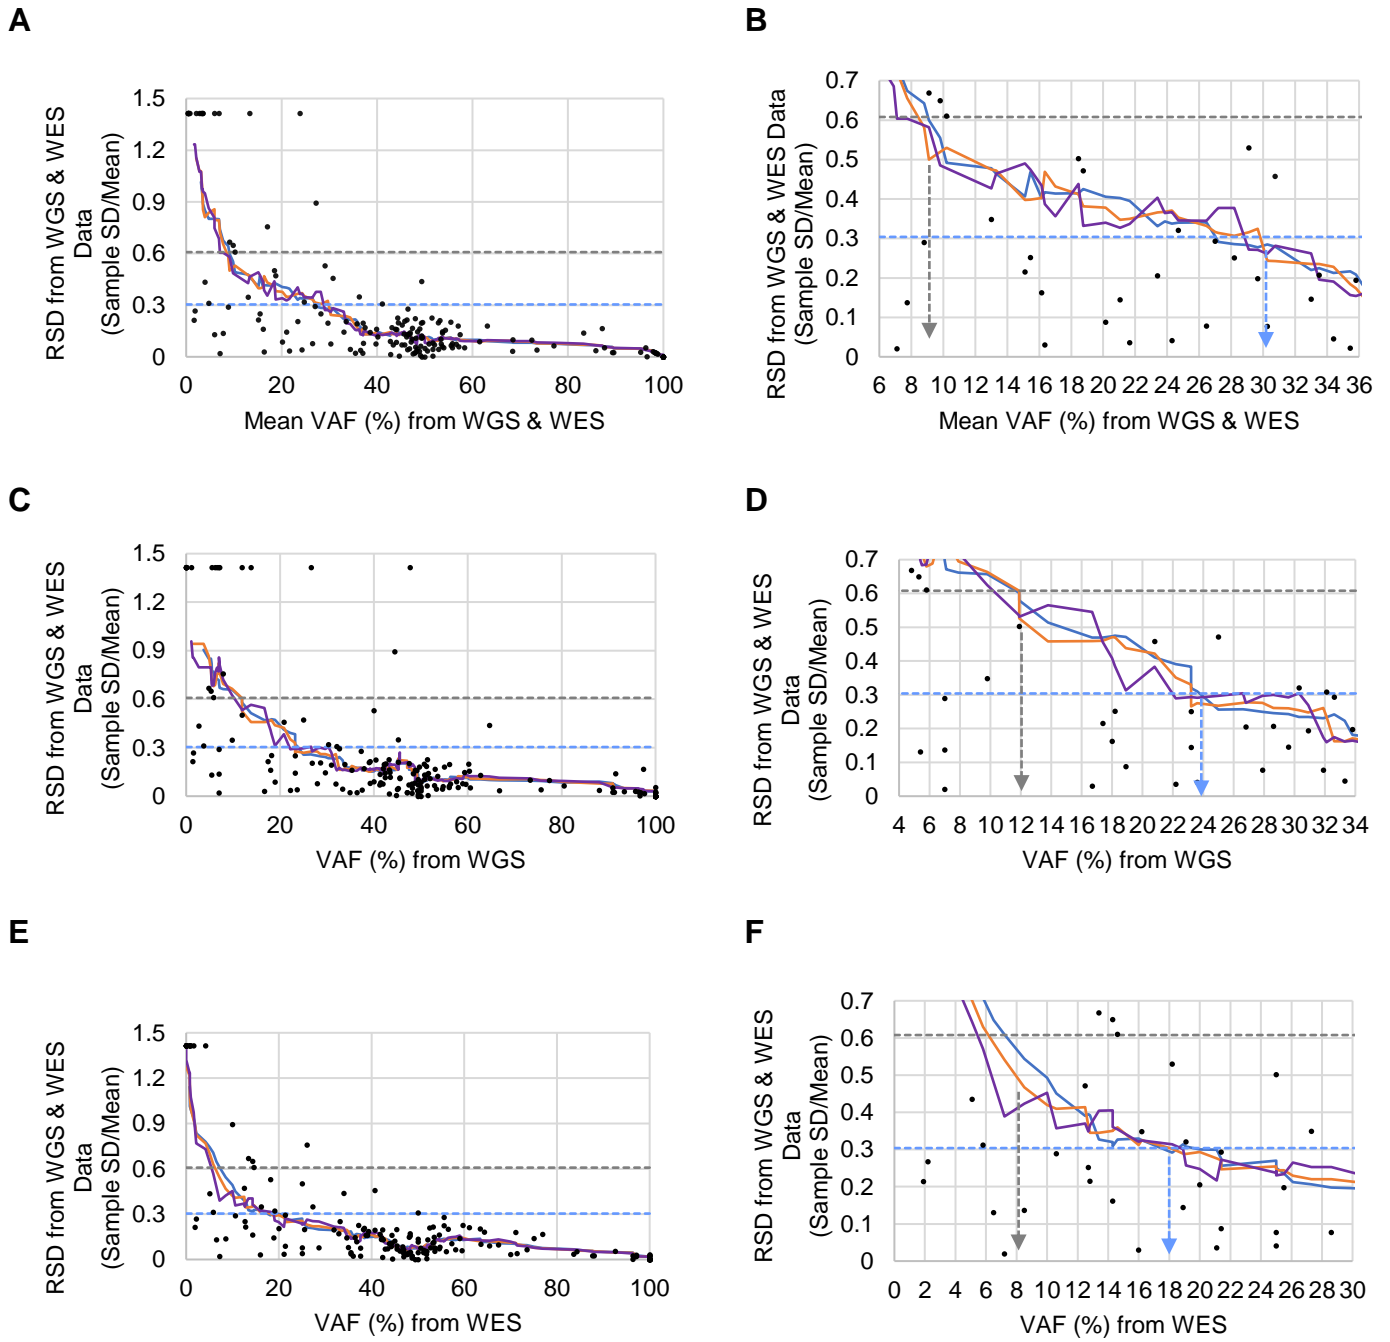



Fig. S2. The detection limit (LOD) and decision limit for VAFs, as determined by WGS and WES. WGS and WES were conducted in parallel. To ensure consistency between the results of the WGS and WES, the LOD ( $L_D$ ) and decision limit (critical value,  $L_C$ ) (IUPAC Commission on Analytical Nomenclature, Pure & Appl Chem. 1995;67:1699-1723) for VAFs were examined, based on the relative standard deviations (RSDs) of VAFs obtained by WGS and WES for common SNVs/del in common samples of iPSCs and iPSC derivatives from cell lines 16E84, 16E85, 16H12, and 15M38, according to the method reported by Miura *et al.* (Miura T *et al.*, BMC Genom Data. 2021;22:8). A and B show the relationships between the mean VAFs of SNVs/del measured by WGS and WES and their RSDs. WES was conducted in parallel with WGS, as shown in Table 1. The purple, orange, and dark blue lines represent moving averages of 13, 17, and 21 data points, respectively. In C and D, the RSD of the mean VAF of an SNVs/del measured by WGS and WES was plotted against the VAF of the SNVs/del measured by WGS. In E and F, the RSD of the average VAF of an SNVs/del measured by WGS and WES was plotted against the VAF of the SNVs/del measured by WES. Based on these results, when the average VAF of an SNVs/del measured by WGS and WES was less than or equal to 30% (i.e., its LOD), which gave an RSD of 0.30, the SNVs/del were detected with sufficient certainty, and if the average VAF was greater than or equal to 9% (i.e., its decision limit), which gave an RSD of 0.61, the SNVs/del were detected above the LOD (A and B). When the VAF of an SNV/del was greater than its LOD and decision limit, the VAF of the SNV/del measured by WGS was greater than 24% and 12% in most cases, respectively (C and D). In the current study, these values are referred to as the LOD and decision limit for VAF in WGS, respectively.

**Fig. S3**

**A** Profile of CNVs from 16E84-iPSCs and their derivatives

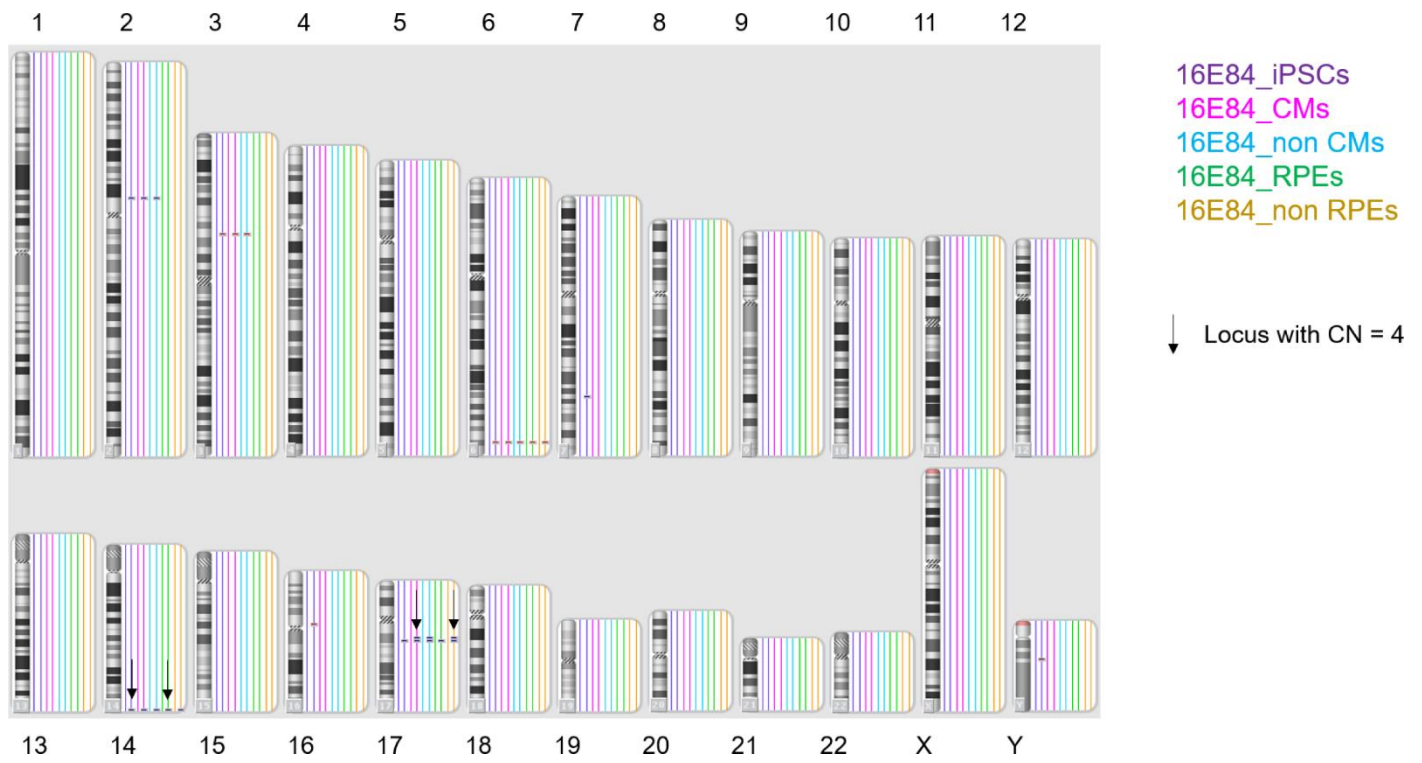

**B** Profile of CNVs of 16E85-iPSCs and their derivatives

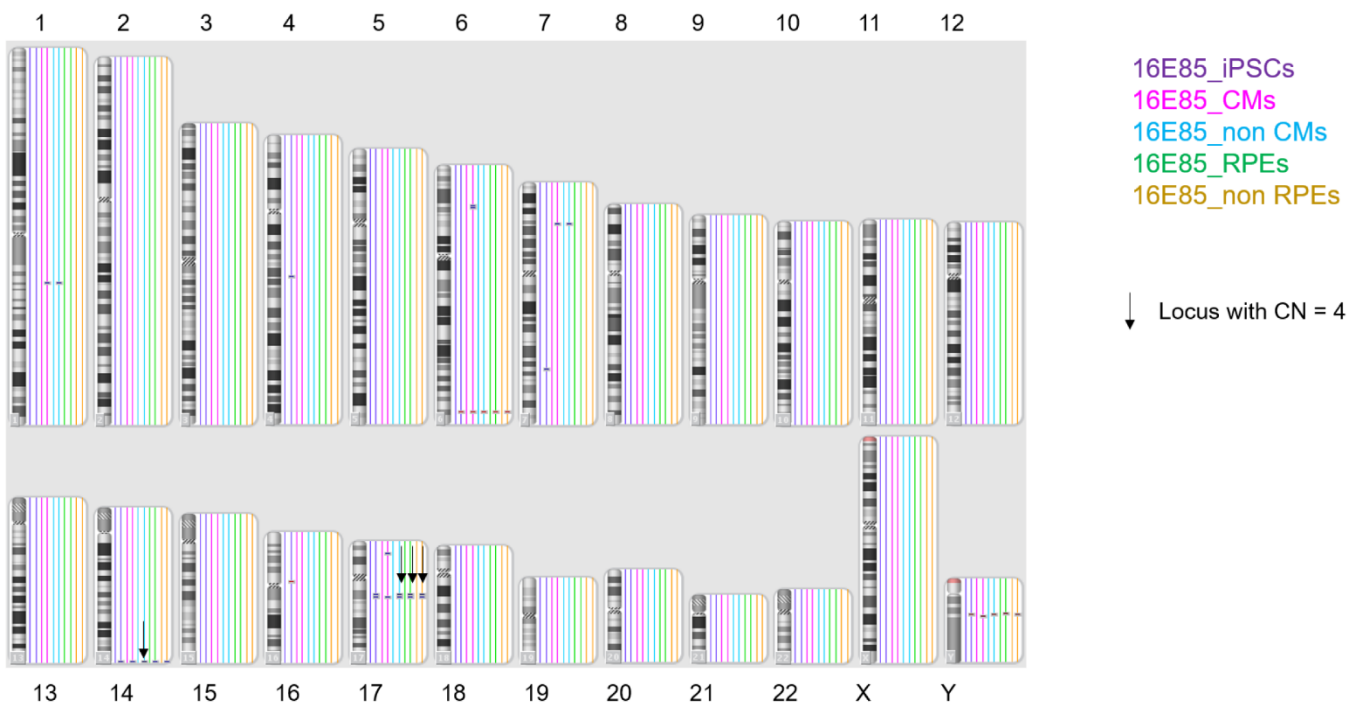

**C** Profile of CNVs of 16H12-iPSCs and their derivatives

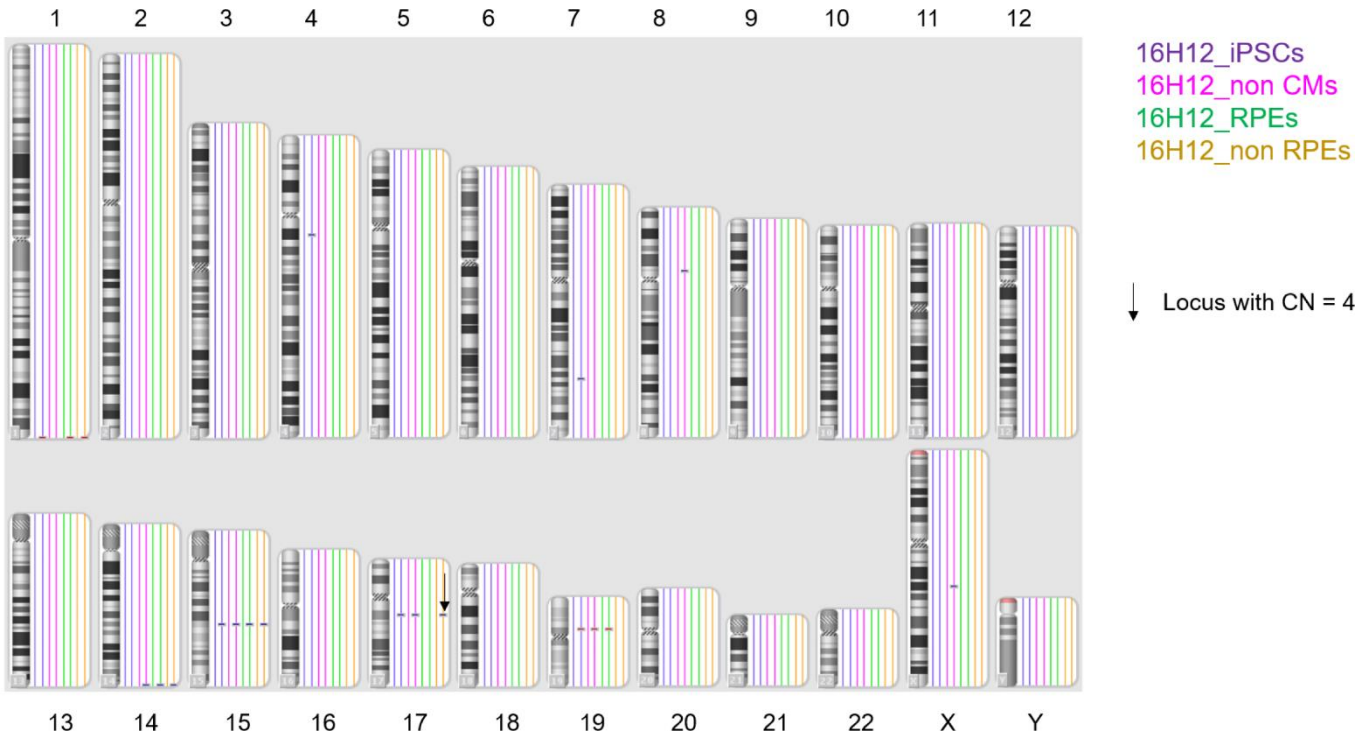

**D** Profile of CNVs of 15M38-iPSCs and their derivatives

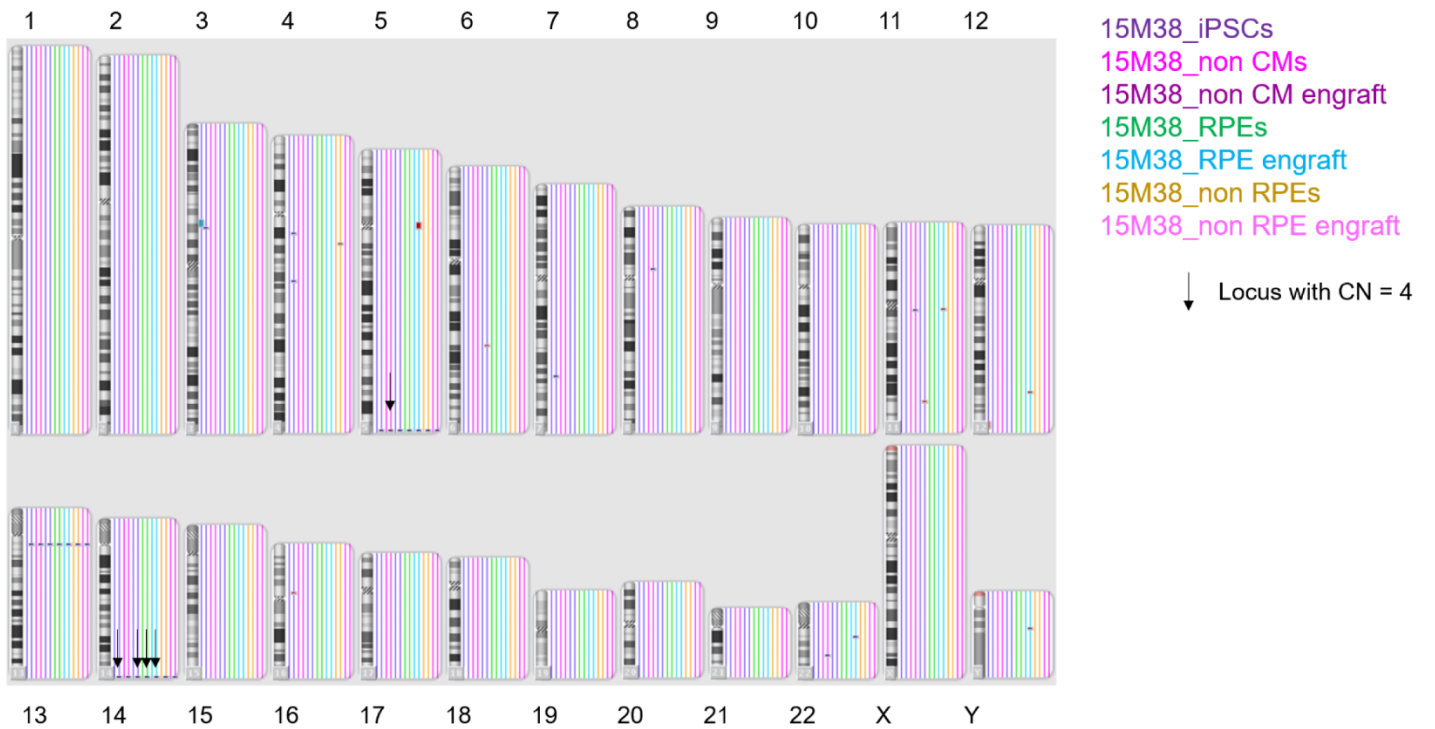



**E** Profile of CNVs of H9-ESCs and their derivatives

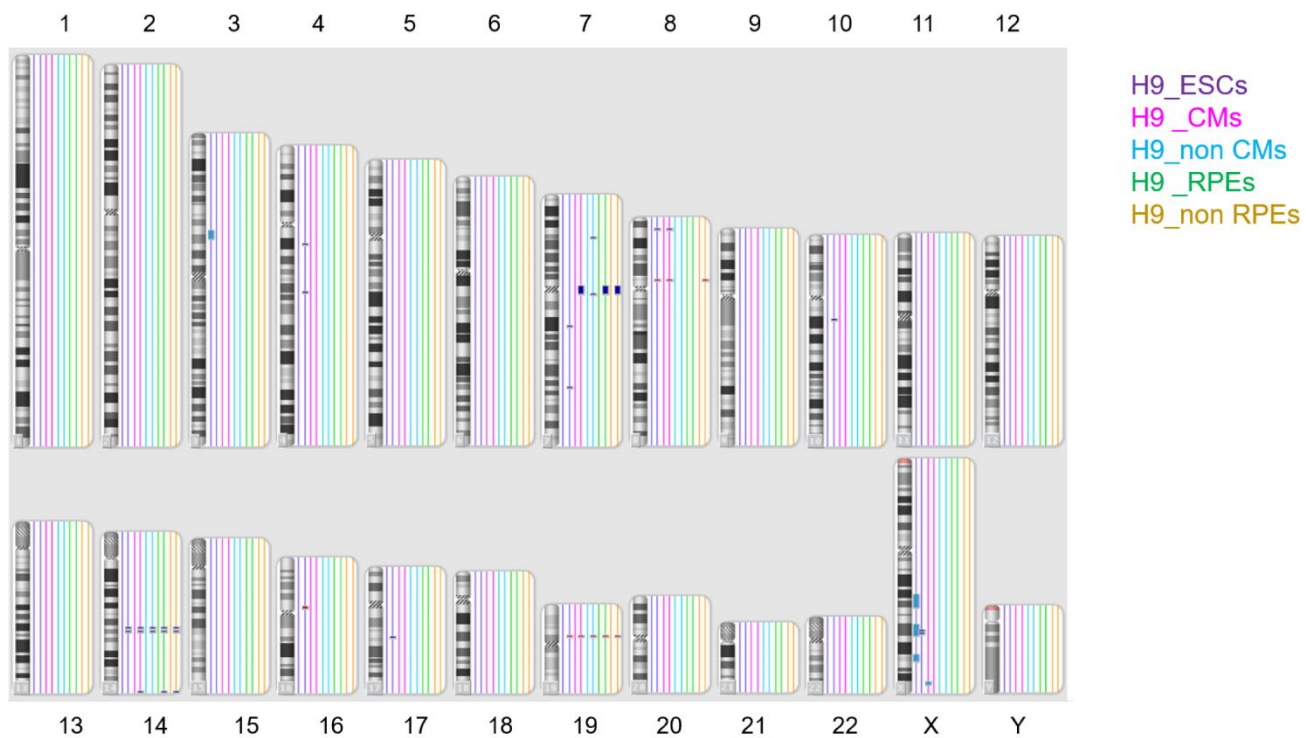

Fig. S3. A: Profile of CNVs from 16E84-iPSCs and their derivatives. B: Profile of CNVs from 16E85-iPSCs and their derivatives. C: Profile of CNVs from 16H12-iPSCs and their derivatives. D: Profile of CNVs from 15M38-iPSCs and their derivatives. E: Profile of CNVs from H9-iPSCs and their derivatives.

Fig.S4

A CNVs detected in Ff-WJ14s01-iPSCs and their derivatives

 Copy number = 4

CNVs observed only in iPSCs

CNVs observed before and after differentiation

| File            | FfWJ1401<br>_iPS | FfWJ1401<br>_iPS                              | FfWJ1401<br>_iPS | FfWJ1401<br>_NSC | FfWJ1401<br>_iPS   | FfWJ1401<br>_NSC   | FfWJ1401<br>_iPS                | FfWJ1401<br>_NSC                | FfWJ1401<br>_iPS                   | FfWJ1401<br>_NSC                   | FfWJ1401<br>_iPS                  | FfWJ1401<br>_NSC                                                                                                  | FfWJ1401<br>_iPS | FfWJ1401<br>_NSC |                                                                                                                |                                                                                                                |
|-----------------|------------------|-----------------------------------------------|------------------|------------------|--------------------|--------------------|---------------------------------|---------------------------------|------------------------------------|------------------------------------|-----------------------------------|-------------------------------------------------------------------------------------------------------------------|------------------|------------------|----------------------------------------------------------------------------------------------------------------|----------------------------------------------------------------------------------------------------------------|
| <b>CN State</b> | <b>3</b>         | <b>0</b>                                      | <b>3</b>         | <b>3</b>         | <b>3</b>           | <b>3</b>           | <b>3</b>                        | <b>3</b>                        | <b>4</b>                           | <b>3</b>                           | <b>3</b>                          | <b>3</b>                                                                                                          | <b>1</b>         | <b>1</b>         |                                                                                                                |                                                                                                                |
| Type            | Gain             | Loss                                          | Gain             | Gain             | Gain               | Gain               | Gain                            | Gain                            | Gain                               | Gain                               | Gain                              | Gain                                                                                                              | Loss             | Loss             |                                                                                                                |                                                                                                                |
| Chromosome      | 7                | Y                                             | 2                | 2                | 5                  | 5                  | 8                               | 8                               | 13                                 | 13                                 | 14                                | 14                                                                                                                | 22               | 22               | 16                                                                                                             | 16                                                                                                             |
| Cytoband Start  | q31.32           | q11.223                                       | q23.3            | q23.3            | q35.3              | q35.3              | p11.22                          | p11.22                          | q12.12                             | q12.12                             | q32.33                            | q32.33                                                                                                            | q11.22           | q11.22           | p11.2                                                                                                          | p11.2                                                                                                          |
| Size (kbp)      | 132.052          | 206.092                                       | 167.379          | 168.393          | 219.303            | 201.787            | 154.025                         | 166.703                         | 199.759                            | 204.623                            | 407.886                           | 478.397                                                                                                           | 100.807          | 159.149          | 394.374                                                                                                        | 394.374                                                                                                        |
| Marker Count    | 259              | 156                                           | 128              | 130              | 124                | 123                | 74                              | 86                              | 288                                | 289                                | 56                                | 157                                                                                                               | 86               | 94               | 60                                                                                                             | 60                                                                                                             |
| Gene Count      | 1                | 3                                             | 1                | 1                | 1                  | 1                  | 2                               | 2                               | 2                                  | 2                                  | 2                                 | 6                                                                                                                 | 1                | 1                | 4                                                                                                              | 4                                                                                                              |
| Genes           | <i>CADPS2</i>    | <i>DAZ3</i> ,<br><i>DAZ4</i> ,<br><i>DAZ2</i> | <i>RPRM</i>      | <i>RPRM</i>      | <i>ADAMTS</i><br>2 | <i>ADAMTS</i><br>2 | <i>ADAM5</i> ,<br><i>ADAM3A</i> | <i>ADAM5</i> ,<br><i>ADAM3A</i> | <i>SPATA13</i><br>, <i>MIR2276</i> | <i>SPATA13</i><br>, <i>MIR2276</i> | <i>KIAA0125</i><br>, <i>ADAM6</i> | <i>MIR4539</i> ,<br><i>MIR4507</i> ,<br><i>MIR4538</i> ,<br><i>MIR4537</i> ,<br><i>KIAA0125</i><br>, <i>ADAM6</i> | <i>MIR650</i>    | <i>MIR650</i>    | <i>TP53TG3</i><br><i>B</i> ,<br><i>TP53TG3</i> ,<br><i>TP53TG3</i><br><i>C</i> ,<br><i>SLC6A10</i><br><i>P</i> | <i>TP53TG3</i><br><i>B</i> ,<br><i>TP53TG3</i> ,<br><i>TP53TG3</i><br><i>C</i> ,<br><i>SLC6A10</i><br><i>P</i> |

**B CNVs detected in 1210B2-iPSCs and their derivatives**

 Copy number = 4

CNVs observed only in iPSCs

CNVs newly acquired after differentiation

CNVs observed before and after differentiation

| File            | 1210B2_iPS            | 1210B2_iPS                           | 1210B2_iPS                                                                                                                                                                                                                                                                                                                                               |
|-----------------|-----------------------|--------------------------------------|----------------------------------------------------------------------------------------------------------------------------------------------------------------------------------------------------------------------------------------------------------------------------------------------------------------------------------------------------------|
| <b>CN State</b> | <b>3</b>              | <b>3</b>                             | <b>2.2546268</b>                                                                                                                                                                                                                                                                                                                                         |
| Type            | Gain                  | Gain                                 | GainMosaic                                                                                                                                                                                                                                                                                                                                               |
| Chromosome      | 4                     | 7                                    | 3                                                                                                                                                                                                                                                                                                                                                        |
| Cytoband Start  | q13.1                 | q31.32                               | p14.2                                                                                                                                                                                                                                                                                                                                                    |
| Size (kbp)      | 135.294               | 571.687                              | 6294.992                                                                                                                                                                                                                                                                                                                                                 |
| Marker Count    | 121                   | 948                                  | 6539                                                                                                                                                                                                                                                                                                                                                     |
| Gene Count      | 2                     | 4                                    | 32                                                                                                                                                                                                                                                                                                                                                       |
| Genes           | ADGRL3,<br>ADGRL3-AS1 | AASS, FEZF1,<br>FEZF1-AS1,<br>CADPS2 | FHIT, PTPRG, PTPRG-AS1,<br>C3orf14, FEZF2, CADPS,<br>LINC00698, SYNPR, SYNPR-<br>AS1, SNTN, C3orf49, THOC7,<br>THOC7-AS1, ATXN7, PSMD6-<br>AS2, PSMD6, PRICKLE2-AS1,<br>LINC00994, PRICKLE2,<br>PRICKLE2-AS2, PRICKLE2-<br>AS3, ADAMTS9, ADAMTS9-<br>AS1, ADAMTS9-AS2, MAGI1,<br>MAGI1-AS1, SLC25A26,<br>LRIG1, LOC105377143,<br>KBTBD8, MIR4272, SUCLG2 |

| 1210B2_NPC              | 1210B2_NPC |
|-------------------------|------------|
| <b>3</b>                | <b>3</b>   |
| Gain                    | Gain       |
| 10                      | 22         |
| q11.23                  | q11.22     |
| 122.392                 | 156.472    |
| 72                      | 90         |
| 3                       | 1          |
| PARG, TIMM23B,<br>AGAP6 | MIR650     |

| 1210B2_iPS | 1210B2_NPC | 1210B2_iPS                                                                      | 1210B2_NPC                                                                      |
|------------|------------|---------------------------------------------------------------------------------|---------------------------------------------------------------------------------|
| <b>1</b>   | <b>1</b>   | <b>1</b>                                                                        | <b>1</b>                                                                        |
| Loss       | Loss       | Loss                                                                            | Loss                                                                            |
| 13         | 13         | 20                                                                              | 20                                                                              |
| q12.11     | q12.11     | p11.1                                                                           | p11.1                                                                           |
| 160.797    | 162.486    | 3956.559                                                                        | 3956.559                                                                        |
| 182        | 186        | 56                                                                              | 56                                                                              |
| 1          | 1          | 7                                                                               | 7                                                                               |
| LINC00442  | LINC00442  | FRG1CP, FRG1DP,<br>FRG2EP,<br>LOC105379477,<br>LINC01598,<br>MIR4477A, MIR4477B | FRG1CP, FRG1DP,<br>FRG2EP,<br>LOC105379477,<br>LINC01598,<br>MIR4477A, MIR4477B |

C CNVs detected in Ff-I01-iPSCs and their derivatives

 Sample from transplant

 Copy number = 4

|                   | Ff-I01_<br>NSC p8 | Ff-I01_<br>RPE p3 | Ff-I01_<br>RPE+G1 | Ff-I01_<br>RPE+G1 | Ff-I01_<br>RPE+G1 | Ff-I01_<br>RPE p3               | Ff-I01_<br>NSC p8                                                         | Ff-I01_<br>RPE p3                 | Ff-I01_<br>RPE+G1                                                         | Ff-I01_<br>RPE+G1                                                         | Ff-I01_<br>NSC p8                                                                                                                                                                                                                                                               | Ff-I01_<br>NSC p8                                                                                                                                                                                                                                                               | Ff-I01_<br>RPE p3                                                                                                                                                                                                                                                               | Ff-I01_<br>RPE p3 | Ff-I01_<br>RPE+G1                                                                                                                                                                                                                                | Ff-I01_<br>RPE+G1                                                                                                                                                                                                                                | Ff-I01_<br>NSC p8             |
|-------------------|-------------------|-------------------|-------------------|-------------------|-------------------|---------------------------------|---------------------------------------------------------------------------|-----------------------------------|---------------------------------------------------------------------------|---------------------------------------------------------------------------|---------------------------------------------------------------------------------------------------------------------------------------------------------------------------------------------------------------------------------------------------------------------------------|---------------------------------------------------------------------------------------------------------------------------------------------------------------------------------------------------------------------------------------------------------------------------------|---------------------------------------------------------------------------------------------------------------------------------------------------------------------------------------------------------------------------------------------------------------------------------|-------------------|--------------------------------------------------------------------------------------------------------------------------------------------------------------------------------------------------------------------------------------------------|--------------------------------------------------------------------------------------------------------------------------------------------------------------------------------------------------------------------------------------------------|-------------------------------|
| CN State          | 1                 | 1                 | 1                 | 1                 | 1                 | 3                               | 3                                                                         | 4                                 | 3                                                                         | 3                                                                         | 4                                                                                                                                                                                                                                                                               | 3                                                                                                                                                                                                                                                                               | 4                                                                                                                                                                                                                                                                               | 3                 | 3                                                                                                                                                                                                                                                | 3                                                                                                                                                                                                                                                | 0                             |
| Type              | Loss              | Loss              | Loss              | Loss              | Loss              | Gain                            | Gain                                                                      | Gain                              | Gain                                                                      | Gain                                                                      | Gain                                                                                                                                                                                                                                                                            | Gain                                                                                                                                                                                                                                                                            | Gain                                                                                                                                                                                                                                                                            | Gain              | Gain                                                                                                                                                                                                                                             | Gain                                                                                                                                                                                                                                             | Loss                          |
| Chromosome        | 6                 | 6                 | 6                 | 6                 | 6                 | 8                               | 14                                                                        | 14                                | 14                                                                        | 14                                                                        | 17                                                                                                                                                                                                                                                                              | 17                                                                                                                                                                                                                                                                              | 17                                                                                                                                                                                                                                                                              | 17                | 17                                                                                                                                                                                                                                               | 17                                                                                                                                                                                                                                               | Y                             |
| Cytoband<br>Start | q26               | q26               | q26               | p25.3             | q26               | p11.22                          | q32.33                                                                    | q32.33                            | q32.33                                                                    | q32.33                                                                    | q12                                                                                                                                                                                                                                                                             | q12                                                                                                                                                                                                                                                                             | q12                                                                                                                                                                                                                                                                             | q12               | q12                                                                                                                                                                                                                                              | q12                                                                                                                                                                                                                                              | q11.223                       |
| Genes             | <i>PARK2</i>      | <i>PARK2</i>      | <i>PARK2</i>      | <i>DUSP22</i>     | <i>PARK2</i>      | <i>ADAM5</i> ,<br><i>ADAM3A</i> | <i>MIR4538</i> ,<br><i>MIR4537</i> ,<br><i>KIAA0125</i> ,<br><i>ADAM6</i> | <i>KIAA0125</i> ,<br><i>ADAM6</i> | <i>MIR4538</i> ,<br><i>MIR4537</i> ,<br><i>KIAA0125</i> ,<br><i>ADAM6</i> | <i>MIR4538</i> ,<br><i>MIR4537</i> ,<br><i>KIAA0125</i> ,<br><i>ADAM6</i> | <i>CCL4L1</i> ,<br><i>CCL4L2</i> , <i>CCL4</i> ,<br><i>TBC1D3H</i> ,<br><i>TBC1D3I</i> ,<br><i>TBC1D3G</i> ,<br><i>LOC101060389</i> ,<br><i>TBC1D3L</i> ,<br><i>TBC1D3B</i> ,<br><i>CCL3L3</i> ,<br><i>CCL3L1</i> ,<br><i>LOC440434</i> ,<br><i>TBC1D3K</i> ,<br><i>TBC1D3F</i> | <i>CCL4L1</i> ,<br><i>CCL4L2</i> , <i>CCL4</i> ,<br><i>TBC1D3H</i> ,<br><i>TBC1D3I</i> ,<br><i>TBC1D3G</i> ,<br><i>LOC101060389</i> ,<br><i>TBC1D3L</i> ,<br><i>TBC1D3B</i> ,<br><i>CCL3L3</i> ,<br><i>CCL3L1</i> ,<br><i>LOC440434</i> ,<br><i>TBC1D3K</i> ,<br><i>TBC1D3F</i> | <i>CCL4L1</i> ,<br><i>CCL4L2</i> , <i>CCL4</i> ,<br><i>TBC1D3H</i> ,<br><i>TBC1D3I</i> ,<br><i>TBC1D3G</i> ,<br><i>LOC101060389</i> ,<br><i>TBC1D3L</i> ,<br><i>TBC1D3B</i> ,<br><i>CCL3L3</i> ,<br><i>CCL3L1</i> ,<br><i>LOC440434</i> ,<br><i>TBC1D3K</i> ,<br><i>TBC1D3F</i> | <i>YWHAEP7</i>    | <i>YWHAEP7</i> ,<br><i>TBC1D3</i> ,<br><i>TBC1D3K</i> ,<br><i>TBC1D3H</i> ,<br><i>TBC1D3I</i> ,<br><i>LOC101060389</i> ,<br><i>TBC1D3L</i> ,<br><i>TBC1D3C</i> ,<br><i>TBC1D3F</i> ,<br><i>TBC1D3G</i> ,<br><i>TBC1D3E</i> ,<br><i>LOC440434</i> | <i>YWHAEP7</i> ,<br><i>TBC1D3</i> ,<br><i>TBC1D3K</i> ,<br><i>TBC1D3H</i> ,<br><i>TBC1D3I</i> ,<br><i>LOC101060389</i> ,<br><i>TBC1D3L</i> ,<br><i>TBC1D3C</i> ,<br><i>TBC1D3F</i> ,<br><i>TBC1D3G</i> ,<br><i>TBC1D3E</i> ,<br><i>LOC440434</i> | <i>TTY3</i> ,<br><i>TTY3B</i> |

D CNVs detected in H9 cells and their derivatives

CNVs observed only in iPSCs

| File            | H9_<br>ESC                                                                                                                                                                                                                                                                               | H9_<br>ESC                | H9_<br>ESC                 | H9_<br>ESC    | H9_<br>ESC                                    | H9_<br>ESC                                                        | H9_<br>ESC                                                             | H9_<br>ESC                                                                                              | H9_<br>ESC                                                                                                                                                                                                                                                                                                                                       | H9_<br>ESC         | H9_<br>ESC         | H9_<br>ESC                                                                                                                                                                                                                                                                                                                                                     |
|-----------------|------------------------------------------------------------------------------------------------------------------------------------------------------------------------------------------------------------------------------------------------------------------------------------------|---------------------------|----------------------------|---------------|-----------------------------------------------|-------------------------------------------------------------------|------------------------------------------------------------------------|---------------------------------------------------------------------------------------------------------|--------------------------------------------------------------------------------------------------------------------------------------------------------------------------------------------------------------------------------------------------------------------------------------------------------------------------------------------------|--------------------|--------------------|----------------------------------------------------------------------------------------------------------------------------------------------------------------------------------------------------------------------------------------------------------------------------------------------------------------------------------------------------------------|
| <b>CN State</b> | <b>2.2363653</b>                                                                                                                                                                                                                                                                         | <b>3</b>                  | <b>3</b>                   | <b>3</b>      | <b>3</b>                                      | <b>1</b>                                                          | <b>3</b>                                                               | <b>2.2046766</b>                                                                                        | <b>2.2720542</b>                                                                                                                                                                                                                                                                                                                                 | <b>3</b>           | <b>3</b>           | <b>2.3183916</b>                                                                                                                                                                                                                                                                                                                                               |
| Type            | GainMosaic                                                                                                                                                                                                                                                                               | Gain                      | Gain                       | Gain          | Gain                                          | Loss                                                              | Gain                                                                   | GainMosaic                                                                                              | GainMosaic                                                                                                                                                                                                                                                                                                                                       | Gain               | Gain               | GainMosaic                                                                                                                                                                                                                                                                                                                                                     |
| Chromosome      | 3                                                                                                                                                                                                                                                                                        | 4                         | 4                          | 7             | 7                                             | 16                                                                | 17                                                                     | X                                                                                                       | X                                                                                                                                                                                                                                                                                                                                                | X                  | X                  | X                                                                                                                                                                                                                                                                                                                                                              |
| Cytoband Start  | p14.2                                                                                                                                                                                                                                                                                    | q13.1                     | q22.1                      | q21.11        | q31.32                                        | p11.2                                                             | q21.31                                                                 | q21.31                                                                                                  | q23                                                                                                                                                                                                                                                                                                                                              | q23                | q23                | q26.1                                                                                                                                                                                                                                                                                                                                                          |
| Size (kbp)      | 5502.707                                                                                                                                                                                                                                                                                 | 455.207                   | 630.995                    | 165.699       | 517.617                                       | 1412.952                                                          | 576.398                                                                | 9057.28                                                                                                 | 7652.548                                                                                                                                                                                                                                                                                                                                         | 824.269            | 321.172            | 4523.499                                                                                                                                                                                                                                                                                                                                                       |
| Marker Count    | 5738                                                                                                                                                                                                                                                                                     | 392                       | 616                        | 284           | 704                                           | 112                                                               | 80                                                                     | 5900                                                                                                    | 9526                                                                                                                                                                                                                                                                                                                                             | 382                | 360                | 10143                                                                                                                                                                                                                                                                                                                                                          |
| Gene Count      | 28                                                                                                                                                                                                                                                                                       | 2                         | 2                          | 1             | 5                                             | 6                                                                 | 8                                                                      | 11                                                                                                      | 40                                                                                                                                                                                                                                                                                                                                               | 2                  | 2                  | 41                                                                                                                                                                                                                                                                                                                                                             |
| Genes           | <i>PTPRG, PTPRG-AS1, C3orf14, FEZF2, CADPS, LINC00698, SYNPR, SYNPR-AS1, SNTN, C3orf49, THOC7, THOC7-AS1, ATXN7, PSMD6-AS2, PSMD6, PRICKLE2-AS1, LINC00994, PRICKLE2, PRICKLE2-AS2, PRICKLE2-AS3, ADAMTS9, ADAMTS9-AS1, ADAMTS9-AS2, MAGI1, MAGI1-AS1, SLC25A26, LRIG1, LOC105377143</i> | <i>ADGRL3, ADGRL3-AS1</i> | <i>LOC101929194, GRID2</i> | <i>SEMA3E</i> | <i>PTPRZ1, AASS, FEZF1, FEZF1-AS1, CADPS2</i> | <i>TP53TG3B, TP53TG3, TP53TG3C, SLC6A10P, LOC390705, ENPP7P13</i> | <i>KANSL1, KANSL1-AS1, LRR37A, ARL17B, ARL17A, NSFP1, LRR37A2, NSF</i> | <i>PABPC5-AS1, PABPC5, PCDH11X, MIR4454, NAP1L3, FAM133A, MIR548M, BRDTP1, DIAPH2, RPA4, DIAPH2-AS1</i> | <i>TMEM164, MIR652, MIR3978, AMMECR1, SNORD96B, RGAG1, TDGF1P3, CHRDL1, PAK3, CAPN6, DCX, LINC00890, ALG13, TRPC5, TRPC5OS, ZCCHC16, LHFPL1, AMOT, MIR4329, LOC101928437, XACT, HTR2C, SNORA35, MIR764, MIR1912, MIR1264, MIR1298, MIR1911, MIR448, IL13RA2, LRCH2, RBMXL3, LUZP4, PLS3-AS1, PLS3, DANT2, AGTR2, SLC6A14, CT83, LOC100126447</i> | <i>XACT, HTR2C</i> | <i>PLS3, DANT2</i> | <i>RBMX2, FAM45BP, ENOX2, LOC105373338, LINC01201, ARHGAP36, IGSF1, OR13H1, FIRRE, STK26, FRMD7, RAP2C, RAP2C-AS1, MBNL3, HS6ST2, HS6ST2-AS1, USP26, TFDP3, GPC4, GPC3, MIR363, MIR92A2, MIR19B2, MIR20B, MIR18B, MIR106A, CCDC160, PHF6, HPRT1, MIR450B, MIR450A1, MIR450A2, MIR542, MIR503HG, MIR503, MIR424, LINC00629, PLAC1, FAM122B, FAM122C, MOSPD1</i> |

## D CNVs detected in H9 cells and their derivatives

### CNVs newly acquired after differentiation

| File           | H9_non CM                                                                                                                                                                | H9_non CM      | H9_CM                                                      | H9_<br>RPE                                                 | H9_<br>non RPE                                             | H9_CM                                                                                                                                                                            |
|----------------|--------------------------------------------------------------------------------------------------------------------------------------------------------------------------|----------------|------------------------------------------------------------|------------------------------------------------------------|------------------------------------------------------------|----------------------------------------------------------------------------------------------------------------------------------------------------------------------------------|
| CN State       | 3                                                                                                                                                                        | 3              | 3                                                          | 3                                                          | 3                                                          | 2.2094336                                                                                                                                                                        |
| Type           | Gain                                                                                                                                                                     | Gain           | Gain                                                       | Gain                                                       | Gain                                                       | GainMosaic                                                                                                                                                                       |
| Chromosome     | 7                                                                                                                                                                        | 7              | 14                                                         | 14                                                         | 14                                                         | X                                                                                                                                                                                |
| Cytoband Start | p15.2                                                                                                                                                                    | q11.21         | q32.33                                                     | q32.33                                                     | q32.33                                                     | q28                                                                                                                                                                              |
| Size (kbp)     | 139.348                                                                                                                                                                  | 315.438        | 520.686                                                    | 457.028                                                    | 457.028                                                    | 2139.135                                                                                                                                                                         |
| Marker Count   | 154                                                                                                                                                                      | 78             | 169                                                        | 140                                                        | 140                                                        | 7308                                                                                                                                                                             |
| Gene Count     | 19                                                                                                                                                                       | 1              | 6                                                          | 6                                                          | 6                                                          | 19                                                                                                                                                                               |
| Genes          | <i>HOXA1, HOTAIRM1, HOXA2, HOXA3, HOXA-AS2, HOXA4, HOXA-AS3, HOXA5, HOXA6, HOXA7, HOXA9, HOXA10-HOXA9, HOXA10-AS, MIR196B, HOXA10, HOXA11, HOXA11-AS, HOXA13, HOTTIP</i> | <i>ZNF733P</i> | <i>MIR4539, MIR4507, MIR4538, MIR4537, KIAA0125, ADAM6</i> | <i>MIR4539, MIR4507, MIR4538, MIR4537, KIAA0125, ADAM6</i> | <i>MIR4539, MIR4507, MIR4538, MIR4537, KIAA0125, ADAM6</i> | <i>AFF2, IDS, LINC00893, CXorf40A, LOC101928917, MAGEA9, MAGEA9B, HSFX2, HSFX1, TMEM185A, MAGEA11, LINC00850, MAGEA8-AS1, MAGEA8, CXorf40B, LINC00894, MIR2114, MAMLD1, MTM1</i> |



## D CNVs detected in H9 cells and their derivatives

### CNVs observed before and after differentiation

| File              | H9_<br>ESC                                                                                                                                                                                                                                                                                                                            | H9_<br>CM                                                                                                                                                                                                                                                                                                                             | H9_<br>ESC       | H9_<br>CM        | H9_<br>non RPE   | H9_<br>ESC               | H9_<br>CM                | H9_<br>non CM            | H9_<br>RPE               | H9_<br>non RPE           | H9_<br>ESC | H9_<br>CM | H9_<br>non<br>HCM | H9_<br>RPE | H9_<br>non<br>RPE | H9_<br>ESC | H9_<br>CM | H9_<br>non CM      | H9_<br>RPE         | H9_<br>non RPE     |
|-------------------|---------------------------------------------------------------------------------------------------------------------------------------------------------------------------------------------------------------------------------------------------------------------------------------------------------------------------------------|---------------------------------------------------------------------------------------------------------------------------------------------------------------------------------------------------------------------------------------------------------------------------------------------------------------------------------------|------------------|------------------|------------------|--------------------------|--------------------------|--------------------------|--------------------------|--------------------------|------------|-----------|-------------------|------------|-------------------|------------|-----------|--------------------|--------------------|--------------------|
| CN State          | 3                                                                                                                                                                                                                                                                                                                                     | 3                                                                                                                                                                                                                                                                                                                                     | 1                | 1                | 1                | 3                        | 3                        | 3                        | 3                        | 3                        | 3          | 3         | 3                 | 3          | 3                 | 1          | 1         | 1                  | 1                  | 1                  |
| Type              | Gain                                                                                                                                                                                                                                                                                                                                  | Gain                                                                                                                                                                                                                                                                                                                                  | Loss             | Loss             | Loss             | Gain                     | Gain                     | Gain                     | Gain                     | Gain                     | Gain       | Gain      | Gain              | Gain       | Gain              | Loss       | Loss      | Loss               | Loss               | Loss               |
| Chromosome        | 8                                                                                                                                                                                                                                                                                                                                     | 8                                                                                                                                                                                                                                                                                                                                     | 8                | 8                | 8                | 14                       | 14                       | 14                       | 14                       | 14                       | 14         | 14        | 14                | 14         | 14                | 19         | 19        | 19                 | 19                 | 19                 |
| Cytoband<br>Start | p23.1                                                                                                                                                                                                                                                                                                                                 | p23.1                                                                                                                                                                                                                                                                                                                                 | p11.22           | p11.22           | p11.22           | q23.2                    | q23.2                    | q23.2                    | q23.2                    | q23.2                    | q23.3      | q23.3     | q23.3             | q23.3      | q23.3             | p12        | p12       | p12                | p12                | p12                |
| Size (kbp)        | 1104.225                                                                                                                                                                                                                                                                                                                              | 1104.225                                                                                                                                                                                                                                                                                                                              | 136.649          | 149.343          | 131.348          | 295.834                  | 293.08                   | 303.921                  | 303.921                  | 303.921                  | 404.811    | 422.721   | 422.349           | 424.779    | 410.554           | 104.562    | 107.28    | 122.431            | 117.643            | 124.676            |
| Marker Count      | 68                                                                                                                                                                                                                                                                                                                                    | 68                                                                                                                                                                                                                                                                                                                                    | 72               | 72               | 68               | 332                      | 328                      | 332                      | 332                      | 332                      | 408        | 416       | 415               | 418        | 409               | 68         | 70        | 84                 | 80                 | 86                 |
| Gene Count        | 31                                                                                                                                                                                                                                                                                                                                    | 31                                                                                                                                                                                                                                                                                                                                    | 2                | 2                | 2                | 3                        | 3                        | 3                        | 3                        | 3                        | 1          | 1         | 1                 | 1          | 1                 | 1          | 1         | 2                  | 2                  | 2                  |
| Genes             | LINC00965, FAM66B, DEFB109P1,<br>DEFB109P1B, USP17L1, USP17L4,<br>ZNF705G, DEFB4B, DEFB103B,<br>DEFB103A, SPAG11B, DEFB104B,<br>DEFB104A, DEFB106B, DEFB106A,<br>DEFB105B, DEFB105A, DEFB107B,<br>DEFB107A, PRR23D1, PRR23D2,<br>FAM90A7P, FAM90A10P, SPAG11A,<br>DEFB4A, ZNF705B, FAM66E,<br>USP17L8, USP17L3, MIR548I3,<br>FAM86B3P | LINC00965, FAM66B, DEFB109P1,<br>DEFB109P1B, USP17L1, USP17L4,<br>ZNF705G, DEFB4B, DEFB103B,<br>DEFB103A, SPAG11B, DEFB104B,<br>DEFB104A, DEFB106B, DEFB106A,<br>DEFB105B, DEFB105A, DEFB107B,<br>DEFB107A, PRR23D1, PRR23D2,<br>FAM90A7P, FAM90A10P, SPAG11A,<br>DEFB4A, ZNF705B, FAM66E,<br>USP17L8, USP17L3, MIR548I3,<br>FAM86B3P | ADAM5,<br>ADAM3A | ADAM5,<br>ADAM3A | ADAM5,<br>ADAM3A | KCNH5,<br>RHOJ,<br>GPHB5 | KCNH5,<br>RHOJ,<br>GPHB5 | KCNH5,<br>RHOJ,<br>GPHB5 | KCNH5,<br>RHOJ,<br>GPHB5 | KCNH5,<br>RHOJ,<br>GPHB5 | FUT8       | FUT8      | FUT8              | FUT8       | FUT8              | ZNF826P    | ZNF826P   | ZNF826P,<br>ZNF737 | ZNF826P,<br>ZNF737 | ZNF826P,<br>ZNF737 |

## E CNVs detected in 16E84 cells and their derivatives

### CNVs observed only in iPSCs

| File            | 16E84_<br>iPSC                                        | 16E84_<br>iPSC                |
|-----------------|-------------------------------------------------------|-------------------------------|
| <b>CN State</b> | <b>3</b>                                              | <b>0</b>                      |
| Type            | Gain                                                  | Loss                          |
| Chromosome      | 7                                                     | Y                             |
| Cytoband Start  | q31.32                                                | q11.223                       |
| Size (kbp)      | 125.818                                               | 295.853                       |
| Marker Count    | 232                                                   | 60                            |
| Gene Count      | 3                                                     | 2                             |
| Genes           | <i>FEZF1</i> ,<br><i>FEZF1-AS1</i> ,<br><i>CADPS2</i> | <i>TTY3</i> ,<br><i>TTY3B</i> |

E CNVs detected in 16E84 cells and their derivatives

 Copy number = 4

CNVs observed before and after differentiation

| File           | 16E84_<br>iPSC | 16E84_<br>CM | 16E84_<br>non-CM | 16E84_<br>iPSC | 16E84_<br>RPE | 16E84_<br>non-<br>RPE | 16E84_<br>CM | 16E84_<br>non-CM | 16E84_<br>iPSC                    | 16E84_<br>RPE                     | 16E84_<br>non-RPE                                                         | 16E84_<br>CM                                                              | 16E84_<br>non-CM                                                          | 16E84_<br>iPSC                                                                                                                             | 16E84_<br>RPE                                                                                                                              | 16E84_<br>non-RPE                                                                                                                          | 16E84_<br>non-RPE                                                                                                                                                                                                                                                               | 16E84_<br>CM                                                                                                                               | 16E84_<br>non-CM                                                                                                                           | 16E84_<br>CM                                                                                                                                                                                                                                                                    | 16E84_<br>non-CM                                                                                                                                                                                                                                                                |                                                                                                                                                                                                                                                                                 |
|----------------|----------------|--------------|------------------|----------------|---------------|-----------------------|--------------|------------------|-----------------------------------|-----------------------------------|---------------------------------------------------------------------------|---------------------------------------------------------------------------|---------------------------------------------------------------------------|--------------------------------------------------------------------------------------------------------------------------------------------|--------------------------------------------------------------------------------------------------------------------------------------------|--------------------------------------------------------------------------------------------------------------------------------------------|---------------------------------------------------------------------------------------------------------------------------------------------------------------------------------------------------------------------------------------------------------------------------------|--------------------------------------------------------------------------------------------------------------------------------------------|--------------------------------------------------------------------------------------------------------------------------------------------|---------------------------------------------------------------------------------------------------------------------------------------------------------------------------------------------------------------------------------------------------------------------------------|---------------------------------------------------------------------------------------------------------------------------------------------------------------------------------------------------------------------------------------------------------------------------------|---------------------------------------------------------------------------------------------------------------------------------------------------------------------------------------------------------------------------------------------------------------------------------|
| CN State       | 1              | 1            | 1                | 1              | 1             | 1                     | 1            | 1                | 4                                 | 4                                 | 3                                                                         | 3                                                                         | 3                                                                         | 3                                                                                                                                          | 3                                                                                                                                          | 3                                                                                                                                          | 4                                                                                                                                                                                                                                                                               | 3                                                                                                                                          | 3                                                                                                                                          | 4                                                                                                                                                                                                                                                                               | 3                                                                                                                                                                                                                                                                               |                                                                                                                                                                                                                                                                                 |
| Type           | Loss           | Loss         | Loss             | Loss           | Loss          | Loss                  | Loss         | Loss             | Gain                              | Gain                              | Gain                                                                      | Gain                                                                      | Gain                                                                      | Gain                                                                                                                                       | Gain                                                                                                                                       | Gain                                                                                                                                       | Gain                                                                                                                                                                                                                                                                            | Gain                                                                                                                                       | Gain                                                                                                                                       | Gain                                                                                                                                                                                                                                                                            | Gain                                                                                                                                                                                                                                                                            |                                                                                                                                                                                                                                                                                 |
| Chromosome     | 3              | 3            | 3                | 6              | 6             | 6                     | 6            | 6                | 14                                | 14                                | 14                                                                        | 14                                                                        | 14                                                                        | 17                                                                                                                                         | 17                                                                                                                                         | 17                                                                                                                                         | 17                                                                                                                                                                                                                                                                              | 17                                                                                                                                         | 17                                                                                                                                         | 17                                                                                                                                                                                                                                                                              | 17                                                                                                                                                                                                                                                                              |                                                                                                                                                                                                                                                                                 |
| Cytoband Start | p14.2          | p14.2        | p14.2            | q26            | q26           | q26                   | q26          | q26              | q32.33                            | q32.33                            | q32.33                                                                    | q32.33                                                                    | q32.33                                                                    | q12                                                                                                                                        | q12                                                                                                                                        | q12                                                                                                                                        | q12                                                                                                                                                                                                                                                                             | q12                                                                                                                                        | q12                                                                                                                                        | q12                                                                                                                                                                                                                                                                             | q12                                                                                                                                                                                                                                                                             |                                                                                                                                                                                                                                                                                 |
| Size (kbp)     | 326.226        | 336.324      | 336.324          | 149.529        | 149.529       | 147.433               | 147.433      | 147.433          | 407.886                           | 407.886                           | 485.71                                                                    | 576.567                                                                   | 485.71                                                                    | 205.038                                                                                                                                    | 205.016                                                                                                                                    | 205.038                                                                                                                                    | 367.77                                                                                                                                                                                                                                                                          | 205.016                                                                                                                                    | 205.016                                                                                                                                    | 367.77                                                                                                                                                                                                                                                                          | 367.77                                                                                                                                                                                                                                                                          |                                                                                                                                                                                                                                                                                 |
| Marker Count   | 430            | 434          | 434              | 194            | 194           | 192                   | 192          | 192              | 56                                | 56                                | 164                                                                       | 180                                                                       | 164                                                                       | 106                                                                                                                                        | 104                                                                                                                                        | 106                                                                                                                                        | 64                                                                                                                                                                                                                                                                              | 104                                                                                                                                        | 104                                                                                                                                        | 64                                                                                                                                                                                                                                                                              | 64                                                                                                                                                                                                                                                                              |                                                                                                                                                                                                                                                                                 |
| Gene Count     | 1              | 1            | 1                | 1              | 1             | 1                     | 1            | 1                | 2                                 | 2                                 | 6                                                                         | 6                                                                         | 6                                                                         | 7                                                                                                                                          | 7                                                                                                                                          | 7                                                                                                                                          | 14                                                                                                                                                                                                                                                                              | 7                                                                                                                                          | 7                                                                                                                                          | 14                                                                                                                                                                                                                                                                              | 14                                                                                                                                                                                                                                                                              |                                                                                                                                                                                                                                                                                 |
| Genes          | <i>PTPRG</i>   | <i>PTPRG</i> | <i>PTPRG</i>     | <i>PARK2</i>   | <i>PARK2</i>  | <i>PARK2</i>          | <i>PARK2</i> | <i>PARK2</i>     | <i>KIAA0125</i> ,<br><i>ADAM6</i> | <i>KIAA0125</i> ,<br><i>ADAM6</i> | <i>MIR4538</i> ,<br><i>MIR4537</i> ,<br><i>KIAA0125</i> ,<br><i>ADAM6</i> | <i>MIR4538</i> ,<br><i>MIR4537</i> ,<br><i>KIAA0125</i> ,<br><i>ADAM6</i> | <i>MIR4538</i> ,<br><i>MIR4537</i> ,<br><i>KIAA0125</i> ,<br><i>ADAM6</i> | <i>YWHAEP7</i> ,<br><i>TBC1D3</i> ,<br><i>TBC1D3K</i> ,<br><i>TBC1D3H</i> ,<br><i>TBC1D3I</i> ,<br><i>LOC101060389</i> ,<br><i>TBC1D3L</i> | <i>YWHAEP7</i> ,<br><i>TBC1D3</i> ,<br><i>TBC1D3K</i> ,<br><i>TBC1D3H</i> ,<br><i>TBC1D3I</i> ,<br><i>LOC101060389</i> ,<br><i>TBC1D3L</i> | <i>YWHAEP7</i> ,<br><i>TBC1D3</i> ,<br><i>TBC1D3K</i> ,<br><i>TBC1D3H</i> ,<br><i>TBC1D3I</i> ,<br><i>LOC101060389</i> ,<br><i>TBC1D3L</i> | <i>CCL4L1</i> ,<br><i>CCL4L2</i> , <i>CCL4</i> ,<br><i>TBC1D3H</i> ,<br><i>TBC1D3I</i> ,<br><i>LOC101060389</i> ,<br><i>TBC1D3G</i> ,<br><i>TBC1D3L</i> ,<br><i>TBC1D3B</i> ,<br><i>CCL3L3</i> ,<br><i>CCL3L1</i> ,<br><i>LOC440434</i> ,<br><i>TBC1D3K</i> ,<br><i>TBC1D3F</i> | <i>YWHAEP7</i> ,<br><i>TBC1D3</i> ,<br><i>TBC1D3K</i> ,<br><i>TBC1D3H</i> ,<br><i>TBC1D3I</i> ,<br><i>LOC101060389</i> ,<br><i>TBC1D3L</i> | <i>YWHAEP7</i> ,<br><i>TBC1D3</i> ,<br><i>TBC1D3K</i> ,<br><i>TBC1D3H</i> ,<br><i>TBC1D3I</i> ,<br><i>LOC101060389</i> ,<br><i>TBC1D3L</i> | <i>CCL4L1</i> ,<br><i>CCL4L2</i> , <i>CCL4</i> ,<br><i>TBC1D3H</i> ,<br><i>TBC1D3I</i> ,<br><i>LOC101060389</i> ,<br><i>TBC1D3G</i> ,<br><i>TBC1D3L</i> ,<br><i>TBC1D3B</i> ,<br><i>CCL3L3</i> ,<br><i>CCL3L1</i> ,<br><i>LOC440434</i> ,<br><i>TBC1D3K</i> ,<br><i>TBC1D3F</i> | <i>CCL4L1</i> ,<br><i>CCL4L2</i> , <i>CCL4</i> ,<br><i>TBC1D3H</i> ,<br><i>TBC1D3I</i> ,<br><i>LOC101060389</i> ,<br><i>TBC1D3G</i> ,<br><i>TBC1D3L</i> ,<br><i>TBC1D3B</i> ,<br><i>CCL3L3</i> ,<br><i>CCL3L1</i> ,<br><i>LOC440434</i> ,<br><i>TBC1D3K</i> ,<br><i>TBC1D3F</i> | <i>CCL4L1</i> ,<br><i>CCL4L2</i> , <i>CCL4</i> ,<br><i>TBC1D3H</i> ,<br><i>TBC1D3I</i> ,<br><i>LOC101060389</i> ,<br><i>TBC1D3G</i> ,<br><i>TBC1D3L</i> ,<br><i>TBC1D3B</i> ,<br><i>CCL3L3</i> ,<br><i>CCL3L1</i> ,<br><i>LOC440434</i> ,<br><i>TBC1D3K</i> ,<br><i>TBC1D3F</i> |

F CNVs detected in 16E85-iPSCs and their derivatives

 Copy number = 4

CNVs observed only in iPSCs

CNVs newly acquired after differentiation

| File            | 16E85_<br>iPS | 16E85_<br>iPS                                         | 16E85_<br>CM                                                                                                                                                                                                                                                                                                                                                                                                                                                                          | 16E85_<br>non-CM                                                                                                                                                                                                                                                                                                                                                                                                                                                                                                        | 16E85_<br>CM                                                                                                                                                                                                                                                                                                                                                         | 16E85_<br>CM  | 16E85_<br>CM                                                                                                                                                                                                                                                                                               | 16E85_<br>non-CM                                                                                                                                                                                                                                                                                           | 16E85_<br>CM                                                                                                                                                                                    | 16E85_<br>CM                                                                                                                                               |
|-----------------|---------------|-------------------------------------------------------|---------------------------------------------------------------------------------------------------------------------------------------------------------------------------------------------------------------------------------------------------------------------------------------------------------------------------------------------------------------------------------------------------------------------------------------------------------------------------------------|-------------------------------------------------------------------------------------------------------------------------------------------------------------------------------------------------------------------------------------------------------------------------------------------------------------------------------------------------------------------------------------------------------------------------------------------------------------------------------------------------------------------------|----------------------------------------------------------------------------------------------------------------------------------------------------------------------------------------------------------------------------------------------------------------------------------------------------------------------------------------------------------------------|---------------|------------------------------------------------------------------------------------------------------------------------------------------------------------------------------------------------------------------------------------------------------------------------------------------------------------|------------------------------------------------------------------------------------------------------------------------------------------------------------------------------------------------------------------------------------------------------------------------------------------------------------|-------------------------------------------------------------------------------------------------------------------------------------------------------------------------------------------------|------------------------------------------------------------------------------------------------------------------------------------------------------------|
| <b>CN State</b> | <b>3</b>      | <b>3</b>                                              | <b>3</b>                                                                                                                                                                                                                                                                                                                                                                                                                                                                              | <b>3</b>                                                                                                                                                                                                                                                                                                                                                                                                                                                                                                                | <b>3</b>                                                                                                                                                                                                                                                                                                                                                             | <b>3</b>      | <b>3</b>                                                                                                                                                                                                                                                                                                   | <b>3</b>                                                                                                                                                                                                                                                                                                   | <b>3</b>                                                                                                                                                                                        | <b>0</b>                                                                                                                                                   |
| Type            | Gain          | Gain                                                  | Gain                                                                                                                                                                                                                                                                                                                                                                                                                                                                                  | Gain                                                                                                                                                                                                                                                                                                                                                                                                                                                                                                                    | Gain                                                                                                                                                                                                                                                                                                                                                                 | Gain          | Gain                                                                                                                                                                                                                                                                                                       | Gain                                                                                                                                                                                                                                                                                                       | Gain                                                                                                                                                                                            | Loss                                                                                                                                                       |
| Chromosome      | 4             | 7                                                     | 1                                                                                                                                                                                                                                                                                                                                                                                                                                                                                     | 1                                                                                                                                                                                                                                                                                                                                                                                                                                                                                                                       | 6                                                                                                                                                                                                                                                                                                                                                                    | 6             | 7                                                                                                                                                                                                                                                                                                          | 7                                                                                                                                                                                                                                                                                                          | 17                                                                                                                                                                                              | Y                                                                                                                                                          |
| Cytoband Start  | q22.1         | q31.32                                                | q21.3                                                                                                                                                                                                                                                                                                                                                                                                                                                                                 | q21.3                                                                                                                                                                                                                                                                                                                                                                                                                                                                                                                   | p22.2                                                                                                                                                                                                                                                                                                                                                                | p22.1         | p15.2                                                                                                                                                                                                                                                                                                      | p15.2                                                                                                                                                                                                                                                                                                      | p13.1                                                                                                                                                                                           | q11.23                                                                                                                                                     |
| Size (kbp)      | 140.734       | 131.253                                               | 215.953                                                                                                                                                                                                                                                                                                                                                                                                                                                                               | 234.789                                                                                                                                                                                                                                                                                                                                                                                                                                                                                                                 | 178.283                                                                                                                                                                                                                                                                                                                                                              | 100.178       | 118.37                                                                                                                                                                                                                                                                                                     | 128.137                                                                                                                                                                                                                                                                                                    | 112.7                                                                                                                                                                                           | 205.464                                                                                                                                                    |
| Marker Count    | 144           | 208                                                   | 76                                                                                                                                                                                                                                                                                                                                                                                                                                                                                    | 116                                                                                                                                                                                                                                                                                                                                                                                                                                                                                                                     | 140                                                                                                                                                                                                                                                                                                                                                                  | 60            | 137                                                                                                                                                                                                                                                                                                        | 142                                                                                                                                                                                                                                                                                                        | 80                                                                                                                                                                                              | 52                                                                                                                                                         |
| Gene Count      | 1             | 3                                                     | 18                                                                                                                                                                                                                                                                                                                                                                                                                                                                                    | 20                                                                                                                                                                                                                                                                                                                                                                                                                                                                                                                      | 18                                                                                                                                                                                                                                                                                                                                                                   | 1             | 19                                                                                                                                                                                                                                                                                                         | 19                                                                                                                                                                                                                                                                                                         | 11                                                                                                                                                                                              | 9                                                                                                                                                          |
| Genes           | <i>GRID2</i>  | <i>FEZF1</i> ,<br><i>FEZF1-AS1</i> ,<br><i>CADPS2</i> | <i>DCST1</i> ,<br><i>LOC100505666</i> ,<br><i>ADAM15</i> , <i>EFNA4</i> ,<br><i>ADAM15</i> , <i>EFNA4</i> ,<br><i>EFNA3</i> , <i>EFNA1</i> ,<br><i>EFNA3</i> , <i>EFNA1</i> ,<br><i>SLC50A1</i> , <i>DPM3</i> ,<br><i>KRTCAP2</i> , <i>TRIM46</i> ,<br><i>MUC1</i> , <i>MIR92B</i> ,<br><i>MUC1</i> , <i>MIR92B</i> ,<br><i>THBS3</i> , <i>MTX1</i> ,<br><i>THBS3</i> , <i>MTX1</i> ,<br><i>GBAP1</i> , <i>GBA</i> ,<br><i>GBAP1</i> , <i>GBA</i> ,<br><i>FAM189B</i> , <i>SCAMP3</i> | <i>DCST1</i> ,<br><i>LOC100505666</i> ,<br><i>ADAM15</i> , <i>EFNA4</i> ,<br><i>ADAM15</i> , <i>EFNA4</i> ,<br><i>EFNA3</i> , <i>EFNA1</i> ,<br><i>EFNA3</i> , <i>EFNA1</i> ,<br><i>SLC50A1</i> , <i>DPM3</i> ,<br><i>KRTCAP2</i> , <i>TRIM46</i> ,<br><i>MUC1</i> , <i>MIR92B</i> ,<br><i>MUC1</i> , <i>MIR92B</i> ,<br><i>THBS3</i> , <i>MTX1</i> ,<br><i>THBS3</i> , <i>MTX1</i> ,<br><i>GBAP1</i> , <i>GBA</i> ,<br><i>GBAP1</i> , <i>GBA</i> ,<br><i>FAM189B</i> ,<br><i>SCAMP3</i> , <i>CLK2</i> ,<br><i>HCN3</i> | <i>HIST1H2BD</i> ,<br><i>HIST1H2BE</i> , <i>HIST1H4D</i> ,<br><i>HIST1H3D</i> , <i>HIST1H2AD</i> ,<br><i>HIST1H2BF</i> , <i>HIST1H4E</i> ,<br><i>HIST1H2BG</i> ,<br><i>HIST1H2AE</i> , <i>HIST1H3E</i> ,<br><i>HIST1H1D</i> , <i>HIST1H4F</i> ,<br><i>HIST1H4G</i> , <i>HIST1H3F</i> ,<br><i>HIST1H2BH</i> , <i>HIST1H3G</i> ,<br><i>HIST1H2BI</i> , <i>HIST1H4H</i> | <i>ZNF184</i> | <i>HOXA1</i> ,<br><i>HOTAIRM1</i> ,<br><i>HOXA2</i> , <i>HOXA3</i> ,<br><i>HOXA-AS2</i> ,<br><i>HOXA4</i> , <i>HOXA-AS3</i> , <i>HOXA5</i> ,<br><i>HOXA6</i> , <i>HOXA7</i> ,<br><i>HOXA9</i> , <i>HOXA10-AS</i> , <i>MIR196B</i> ,<br><i>HOXA10</i> , <i>HOXA11-AS</i> ,<br><i>HOXA13</i> , <i>HOTTIP</i> | <i>HOXA1</i> ,<br><i>HOTAIRM1</i> ,<br><i>HOXA2</i> , <i>HOXA3</i> ,<br><i>HOXA-AS2</i> ,<br><i>HOXA4</i> , <i>HOXA-AS3</i> , <i>HOXA5</i> ,<br><i>HOXA6</i> , <i>HOXA7</i> ,<br><i>HOXA9</i> , <i>HOXA10-AS</i> , <i>MIR196B</i> ,<br><i>HOXA10</i> , <i>HOXA11-AS</i> ,<br><i>HOXA13</i> , <i>HOTTIP</i> | <i>HES7</i> , <i>PER1</i> ,<br><i>MIR6883</i> , <i>VAMP2</i> ,<br><i>TMEM107</i> ,<br><i>SNORD118</i> ,<br><i>MIR4521</i> , <i>BORCS6</i> ,<br><i>AURKB</i> ,<br><i>LINC00324</i> , <i>CTC1</i> | <i>DAZ3</i> ,<br><i>DAZ4</i> ,<br><i>DAZ2</i> ,<br><i>BPY2C</i> ,<br><i>BPY2B</i> ,<br><i>BPY2</i> ,<br><i>TTTY4</i> ,<br><i>TTTY4B</i> ,<br><i>TTTY4C</i> |

F CNVs detected in 16E85-iPSCs and their derivatives

 Copy number = 4

CNVs observed before and after differentiation

| File           | 16E85_<br>iPS | 16E85_<br>CM | 16E85_<br>non-CM | 16E85_<br>RPE | 16E85_<br>non-<br>RPE | 16E85_<br>iPS                     | 16E85_<br>RPE                                                             | 16E85_<br>non-RPE                                                                                                 | 16E85_<br>non CM                  | 16E85_<br>iPS                                                                                                                                                                                                                                                     | 16E85_<br>non-CM                                                                                                                                                                                                                                                  | 16E85_<br>RPE                                                                                                                                                                                                                                                     | 16E85_<br>non-RPE                                                                                                                                                                                                                                                 | 16E85_<br>iPS                                                                                                                                                                                                                | 16E85_<br>CM                                                                                                                                                                                   | 16E85_<br>non-CM                                                                                                                                                                               | 16E85_<br>RPE                                                                                                                                                                                  | 16E85_<br>non-RPE                                                                                                                                                                             | 16E85_<br>iPS                                                                                                                                                                                  | 16E85_<br>RPE                                                                                                                                                                                  | 16E85_<br>non-<br>RPE                                                                                                                                                                         | 16E85_<br>non-CM                                                                                                                                                                               |                                                                                                                                                                                                |                                                                                                                                                                                               |                                                                                                                                                                                                |                                                                                                                                                                                                |                                                                                                                                                                                               |                                                                                                                                                                                                |                                                                                                                                                                                                |                                                                                                                                                                                               |
|----------------|---------------|--------------|------------------|---------------|-----------------------|-----------------------------------|---------------------------------------------------------------------------|-------------------------------------------------------------------------------------------------------------------|-----------------------------------|-------------------------------------------------------------------------------------------------------------------------------------------------------------------------------------------------------------------------------------------------------------------|-------------------------------------------------------------------------------------------------------------------------------------------------------------------------------------------------------------------------------------------------------------------|-------------------------------------------------------------------------------------------------------------------------------------------------------------------------------------------------------------------------------------------------------------------|-------------------------------------------------------------------------------------------------------------------------------------------------------------------------------------------------------------------------------------------------------------------|------------------------------------------------------------------------------------------------------------------------------------------------------------------------------------------------------------------------------|------------------------------------------------------------------------------------------------------------------------------------------------------------------------------------------------|------------------------------------------------------------------------------------------------------------------------------------------------------------------------------------------------|------------------------------------------------------------------------------------------------------------------------------------------------------------------------------------------------|-----------------------------------------------------------------------------------------------------------------------------------------------------------------------------------------------|------------------------------------------------------------------------------------------------------------------------------------------------------------------------------------------------|------------------------------------------------------------------------------------------------------------------------------------------------------------------------------------------------|-----------------------------------------------------------------------------------------------------------------------------------------------------------------------------------------------|------------------------------------------------------------------------------------------------------------------------------------------------------------------------------------------------|------------------------------------------------------------------------------------------------------------------------------------------------------------------------------------------------|-----------------------------------------------------------------------------------------------------------------------------------------------------------------------------------------------|------------------------------------------------------------------------------------------------------------------------------------------------------------------------------------------------|------------------------------------------------------------------------------------------------------------------------------------------------------------------------------------------------|-----------------------------------------------------------------------------------------------------------------------------------------------------------------------------------------------|------------------------------------------------------------------------------------------------------------------------------------------------------------------------------------------------|------------------------------------------------------------------------------------------------------------------------------------------------------------------------------------------------|-----------------------------------------------------------------------------------------------------------------------------------------------------------------------------------------------|
| CN State       | 1             | 1            | 1                | 1             | 1                     | 3                                 | 3                                                                         | 3                                                                                                                 | 4                                 | 3                                                                                                                                                                                                                                                                 | 4                                                                                                                                                                                                                                                                 | 4                                                                                                                                                                                                                                                                 | 4                                                                                                                                                                                                                                                                 | 3                                                                                                                                                                                                                            | 3                                                                                                                                                                                              | 3                                                                                                                                                                                              | 3                                                                                                                                                                                              | 3                                                                                                                                                                                             | 0                                                                                                                                                                                              | 0                                                                                                                                                                                              | 0                                                                                                                                                                                             | 0                                                                                                                                                                                              |                                                                                                                                                                                                |                                                                                                                                                                                               |                                                                                                                                                                                                |                                                                                                                                                                                                |                                                                                                                                                                                               |                                                                                                                                                                                                |                                                                                                                                                                                                |                                                                                                                                                                                               |
| Type           | Loss          | Loss         | Loss             | Loss          | Loss                  | Gain                              | Gain                                                                      | Gain                                                                                                              | Gain                              | Gain                                                                                                                                                                                                                                                              | Gain                                                                                                                                                                                                                                                              | Gain                                                                                                                                                                                                                                                              | Gain                                                                                                                                                                                                                                                              | Gain                                                                                                                                                                                                                         | Gain                                                                                                                                                                                           | Gain                                                                                                                                                                                           | Gain                                                                                                                                                                                           | Gain                                                                                                                                                                                          | Loss                                                                                                                                                                                           | Loss                                                                                                                                                                                           | Loss                                                                                                                                                                                          | Loss                                                                                                                                                                                           |                                                                                                                                                                                                |                                                                                                                                                                                               |                                                                                                                                                                                                |                                                                                                                                                                                                |                                                                                                                                                                                               |                                                                                                                                                                                                |                                                                                                                                                                                                |                                                                                                                                                                                               |
| Chromosome     | 6             | 6            | 6                | 6             | 6                     | 14                                | 14                                                                        | 14                                                                                                                | 14                                | 17                                                                                                                                                                                                                                                                | 17                                                                                                                                                                                                                                                                | 17                                                                                                                                                                                                                                                                | 17                                                                                                                                                                                                                                                                | 17                                                                                                                                                                                                                           | 17                                                                                                                                                                                             | 17                                                                                                                                                                                             | 17                                                                                                                                                                                             | 17                                                                                                                                                                                            | Y                                                                                                                                                                                              | Y                                                                                                                                                                                              | Y                                                                                                                                                                                             | Y                                                                                                                                                                                              |                                                                                                                                                                                                |                                                                                                                                                                                               |                                                                                                                                                                                                |                                                                                                                                                                                                |                                                                                                                                                                                               |                                                                                                                                                                                                |                                                                                                                                                                                                |                                                                                                                                                                                               |
| Cytoband Start | q26           | q26          | q26              | q26           | q26                   | q32.33                            | q32.33                                                                    | q32.33                                                                                                            | q32.33                            | q12                                                                                                                                                                                                                                                               | q12                                                                                                                                                                                                                                                               | q12                                                                                                                                                                                                                                                               | q12                                                                                                                                                                                                                                                               | q12                                                                                                                                                                                                                          | q12                                                                                                                                                                                            | q12                                                                                                                                                                                            | q12                                                                                                                                                                                            | q12                                                                                                                                                                                           | q11.223                                                                                                                                                                                        | q11.223                                                                                                                                                                                        | q11.223                                                                                                                                                                                       | q11.223                                                                                                                                                                                        |                                                                                                                                                                                                |                                                                                                                                                                                               |                                                                                                                                                                                                |                                                                                                                                                                                                |                                                                                                                                                                                               |                                                                                                                                                                                                |                                                                                                                                                                                                |                                                                                                                                                                                               |
| Size (kbp)     | 147.433       | 147.433      | 147.433          | 149.529       | 152.046               | 407.886                           | 485.71                                                                    | 485.71                                                                                                            | 407.886                           | 367.77                                                                                                                                                                                                                                                            | 367.77                                                                                                                                                                                                                                                            | 367.77                                                                                                                                                                                                                                                            | 367.77                                                                                                                                                                                                                                                            | 205.016                                                                                                                                                                                                                      | 205.016                                                                                                                                                                                        | 205.038                                                                                                                                                                                        | 205.016                                                                                                                                                                                        | 410.448                                                                                                                                                                                       | 296.203                                                                                                                                                                                        | 219.036                                                                                                                                                                                        | 295.853                                                                                                                                                                                       | 296.107                                                                                                                                                                                        |                                                                                                                                                                                                |                                                                                                                                                                                               |                                                                                                                                                                                                |                                                                                                                                                                                                |                                                                                                                                                                                               |                                                                                                                                                                                                |                                                                                                                                                                                                |                                                                                                                                                                                               |
| Marker Count   | 192           | 192          | 192              | 194           | 195                   | 56                                | 164                                                                       | 164                                                                                                               | 56                                | 64                                                                                                                                                                                                                                                                | 64                                                                                                                                                                                                                                                                | 64                                                                                                                                                                                                                                                                | 64                                                                                                                                                                                                                                                                | 104                                                                                                                                                                                                                          | 104                                                                                                                                                                                            | 106                                                                                                                                                                                            | 104                                                                                                                                                                                            | 110                                                                                                                                                                                           | 64                                                                                                                                                                                             | 168                                                                                                                                                                                            | 60                                                                                                                                                                                            | 62                                                                                                                                                                                             |                                                                                                                                                                                                |                                                                                                                                                                                               |                                                                                                                                                                                                |                                                                                                                                                                                                |                                                                                                                                                                                               |                                                                                                                                                                                                |                                                                                                                                                                                                |                                                                                                                                                                                               |
| Gene Count     | 1             | 1            | 1                | 1             | 1                     | 2                                 | 6                                                                         | 6                                                                                                                 | 2                                 | 14                                                                                                                                                                                                                                                                | 14                                                                                                                                                                                                                                                                | 14                                                                                                                                                                                                                                                                | 14                                                                                                                                                                                                                                                                | 7                                                                                                                                                                                                                            | 7                                                                                                                                                                                              | 7                                                                                                                                                                                              | 7                                                                                                                                                                                              | 12                                                                                                                                                                                            | 2                                                                                                                                                                                              | 3                                                                                                                                                                                              | 2                                                                                                                                                                                             | 2                                                                                                                                                                                              |                                                                                                                                                                                                |                                                                                                                                                                                               |                                                                                                                                                                                                |                                                                                                                                                                                                |                                                                                                                                                                                               |                                                                                                                                                                                                |                                                                                                                                                                                                |                                                                                                                                                                                               |
| Genes          | <i>PARK2</i>  | <i>PARK2</i> | <i>PARK2</i>     | <i>PARK2</i>  | <i>PARK2</i>          | <i>KIAA0125</i> ,<br><i>ADAM6</i> | <i>MIR4538</i> ,<br><i>MIR4537</i> ,<br><i>KIAA0125</i> ,<br><i>ADAM6</i> | <i>MIR4539</i> ,<br><i>MIR4507</i> ,<br><i>MIR4538</i> ,<br><i>MIR4537</i> ,<br><i>KIAA0125</i> ,<br><i>ADAM6</i> | <i>KIAA0125</i> ,<br><i>ADAM6</i> | <i>CCL4L1</i> ,<br><i>CCL4L2</i> ,<br><i>TBC1D3H</i> ,<br><i>TBC1D3I</i> ,<br><i>LOC101060389</i> ,<br><i>TBC1D3G</i> ,<br><i>TBC1D3L</i> ,<br><i>TBC1D3B</i> ,<br><i>CCL3L3</i> ,<br><i>CCL3L1</i> ,<br><i>LOC440434</i> ,<br><i>TBC1D3K</i> ,<br><i>TBC1D3F</i> | <i>CCL4L1</i> ,<br><i>CCL4L2</i> ,<br><i>TBC1D3H</i> ,<br><i>TBC1D3I</i> ,<br><i>LOC101060389</i> ,<br><i>TBC1D3G</i> ,<br><i>TBC1D3L</i> ,<br><i>TBC1D3B</i> ,<br><i>CCL3L3</i> ,<br><i>CCL3L1</i> ,<br><i>LOC440434</i> ,<br><i>TBC1D3K</i> ,<br><i>TBC1D3F</i> | <i>CCL4L1</i> ,<br><i>CCL4L2</i> ,<br><i>TBC1D3H</i> ,<br><i>TBC1D3I</i> ,<br><i>LOC101060389</i> ,<br><i>TBC1D3G</i> ,<br><i>TBC1D3L</i> ,<br><i>TBC1D3B</i> ,<br><i>CCL3L3</i> ,<br><i>CCL3L1</i> ,<br><i>LOC440434</i> ,<br><i>TBC1D3K</i> ,<br><i>TBC1D3F</i> | <i>CCL4L1</i> ,<br><i>CCL4L2</i> ,<br><i>TBC1D3H</i> ,<br><i>TBC1D3I</i> ,<br><i>LOC101060389</i> ,<br><i>TBC1D3G</i> ,<br><i>TBC1D3L</i> ,<br><i>TBC1D3B</i> ,<br><i>CCL3L3</i> ,<br><i>CCL3L1</i> ,<br><i>LOC440434</i> ,<br><i>TBC1D3K</i> ,<br><i>TBC1D3F</i> | <i>YWHAEP7</i> ,<br><i>TBC1D3</i> ,<br><i>TBC1D3K</i> ,<br><i>TBC1D3H</i> ,<br><i>TBC1D3I</i> ,<br><i>LOC101060389</i> ,<br><i>TBC1D3C</i> ,<br><i>TBC1D3F</i> ,<br><i>TBC1D3G</i> ,<br><i>TBC1D3E</i> ,<br><i>LOC440434</i> | <i>YWHAEP7</i> ,<br><i>TBC1D3</i> ,<br><i>TBC1D3K</i> ,<br><i>TBC1D3H</i> ,<br><i>TBC1D3I</i> ,<br><i>LOC101060389</i> ,<br><i>TTTY3</i> ,<br><i>DAZ3</i> ,<br><i>TTTY3B</i> ,<br><i>TTTY3</i> | <i>YWHAEP7</i> ,<br><i>TBC1D3</i> ,<br><i>TBC1D3K</i> ,<br><i>TBC1D3H</i> ,<br><i>TBC1D3I</i> ,<br><i>LOC101060389</i> ,<br><i>TTTY3</i> ,<br><i>DAZ4</i> ,<br><i>TTTY3B</i> ,<br><i>TTTY3</i> | <i>YWHAEP7</i> ,<br><i>TBC1D3</i> ,<br><i>TBC1D3K</i> ,<br><i>TBC1D3H</i> ,<br><i>TBC1D3I</i> ,<br><i>LOC101060389</i> ,<br><i>TTTY3</i> ,<br><i>DAZ2</i> ,<br><i>TTTY3B</i> ,<br><i>TTTY3</i> | <i>YWHAEP7</i> ,<br><i>TBC1D3</i> ,<br><i>TBC1D3K</i> ,<br><i>TBC1D3H</i> ,<br><i>TBC1D3I</i> ,<br><i>LOC101060389</i> ,<br><i>TTTY3</i> ,<br><i>DAZ3</i> ,<br><i>TTTY3</i> ,<br><i>TTTY3</i> | <i>YWHAEP7</i> ,<br><i>TBC1D3</i> ,<br><i>TBC1D3K</i> ,<br><i>TBC1D3H</i> ,<br><i>TBC1D3I</i> ,<br><i>LOC101060389</i> ,<br><i>TTTY3</i> ,<br><i>DAZ4</i> ,<br><i>TTTY3B</i> ,<br><i>TTTY3</i> | <i>YWHAEP7</i> ,<br><i>TBC1D3</i> ,<br><i>TBC1D3K</i> ,<br><i>TBC1D3H</i> ,<br><i>TBC1D3I</i> ,<br><i>LOC101060389</i> ,<br><i>TTTY3</i> ,<br><i>DAZ2</i> ,<br><i>TTTY3B</i> ,<br><i>TTTY3</i> | <i>YWHAEP7</i> ,<br><i>TBC1D3</i> ,<br><i>TBC1D3K</i> ,<br><i>TBC1D3H</i> ,<br><i>TBC1D3I</i> ,<br><i>LOC101060389</i> ,<br><i>TTTY3</i> ,<br><i>DAZ3</i> ,<br><i>TTTY3</i> ,<br><i>TTTY3</i> | <i>YWHAEP7</i> ,<br><i>TBC1D3</i> ,<br><i>TBC1D3K</i> ,<br><i>TBC1D3H</i> ,<br><i>TBC1D3I</i> ,<br><i>LOC101060389</i> ,<br><i>TTTY3</i> ,<br><i>DAZ4</i> ,<br><i>TTTY3B</i> ,<br><i>TTTY3</i> | <i>YWHAEP7</i> ,<br><i>TBC1D3</i> ,<br><i>TBC1D3K</i> ,<br><i>TBC1D3H</i> ,<br><i>TBC1D3I</i> ,<br><i>LOC101060389</i> ,<br><i>TTTY3</i> ,<br><i>DAZ2</i> ,<br><i>TTTY3B</i> ,<br><i>TTTY3</i> | <i>YWHAEP7</i> ,<br><i>TBC1D3</i> ,<br><i>TBC1D3K</i> ,<br><i>TBC1D3H</i> ,<br><i>TBC1D3I</i> ,<br><i>LOC101060389</i> ,<br><i>TTTY3</i> ,<br><i>DAZ3</i> ,<br><i>TTTY3</i> ,<br><i>TTTY3</i> | <i>YWHAEP7</i> ,<br><i>TBC1D3</i> ,<br><i>TBC1D3K</i> ,<br><i>TBC1D3H</i> ,<br><i>TBC1D3I</i> ,<br><i>LOC101060389</i> ,<br><i>TTTY3</i> ,<br><i>DAZ4</i> ,<br><i>TTTY3B</i> ,<br><i>TTTY3</i> | <i>YWHAEP7</i> ,<br><i>TBC1D3</i> ,<br><i>TBC1D3K</i> ,<br><i>TBC1D3H</i> ,<br><i>TBC1D3I</i> ,<br><i>LOC101060389</i> ,<br><i>TTTY3</i> ,<br><i>DAZ2</i> ,<br><i>TTTY3B</i> ,<br><i>TTTY3</i> | <i>YWHAEP7</i> ,<br><i>TBC1D3</i> ,<br><i>TBC1D3K</i> ,<br><i>TBC1D3H</i> ,<br><i>TBC1D3I</i> ,<br><i>LOC101060389</i> ,<br><i>TTTY3</i> ,<br><i>DAZ3</i> ,<br><i>TTTY3</i> ,<br><i>TTTY3</i> | <i>YWHAEP7</i> ,<br><i>TBC1D3</i> ,<br><i>TBC1D3K</i> ,<br><i>TBC1D3H</i> ,<br><i>TBC1D3I</i> ,<br><i>LOC101060389</i> ,<br><i>TTTY3</i> ,<br><i>DAZ4</i> ,<br><i>TTTY3B</i> ,<br><i>TTTY3</i> | <i>YWHAEP7</i> ,<br><i>TBC1D3</i> ,<br><i>TBC1D3K</i> ,<br><i>TBC1D3H</i> ,<br><i>TBC1D3I</i> ,<br><i>LOC101060389</i> ,<br><i>TTTY3</i> ,<br><i>DAZ2</i> ,<br><i>TTTY3B</i> ,<br><i>TTTY3</i> | <i>YWHAEP7</i> ,<br><i>TBC1D3</i> ,<br><i>TBC1D3K</i> ,<br><i>TBC1D3H</i> ,<br><i>TBC1D3I</i> ,<br><i>LOC101060389</i> ,<br><i>TTTY3</i> ,<br><i>DAZ3</i> ,<br><i>TTTY3</i> ,<br><i>TTTY3</i> |

G CNVs detected in 16H12-iPSCs and their derivatives

 Copy number = 4

CNVs observed only in iPSCs

CNVs newly acquired after differentiation

CNVs observed before and after differentiation

| File           | 16H12_<br>iPSC | 16H12_<br>iPSC                              |
|----------------|----------------|---------------------------------------------|
| CN State       | 3              | 3                                           |
| Type           | Gain           | Gain                                        |
| Chromosome     | 4              | 7                                           |
| Cytoband Start | q13.1          | q31.32                                      |
| Size (kbp)     | 209.149        | 431.245                                     |
| Marker Count   | 204            | 588                                         |
| Gene Count     | 1              | 4                                           |
| Genes          | ADGRL3         | AASS,<br>FEZF1,<br>FEZF1-<br>AS1,<br>CADPS2 |

| 16H12_<br>non-CM | 16H12_<br>nonCM                                                                  | 16H12_<br>RPE                                                                    | 16H12_<br>non-RPE                                                                |
|------------------|----------------------------------------------------------------------------------|----------------------------------------------------------------------------------|----------------------------------------------------------------------------------|
| 3                | 3                                                                                | 3                                                                                | 3                                                                                |
| Gain             | Gain                                                                             | Gain                                                                             | Gain                                                                             |
| 8                | 14                                                                               | 14                                                                               | 14                                                                               |
| p11.22           | q32.33                                                                           | q32.33                                                                           | q32.33                                                                           |
| 148.275          | 619.982                                                                          | 608.617                                                                          | 601.304                                                                          |
| 78               | 200                                                                              | 201                                                                              | 194                                                                              |
| 2                | 7                                                                                | 7                                                                                | 7                                                                                |
| ADAM5,<br>ADAM3A | MIR4539,<br>MIR4507,<br>MIR4538,<br>MIR4537,<br>KIAA0125,<br>ADAM6,<br>LINC00226 | MIR4539,<br>MIR4507,<br>MIR4538,<br>MIR4537,<br>KIAA0125,<br>ADAM6,<br>LINC00226 | MIR4539,<br>MIR4507,<br>MIR4538,<br>MIR4537,<br>KIAA0125,<br>ADAM6,<br>LINC00226 |

| 16H12_<br>iPSC                          | 16H12_<br>RPE                           | 16H12_<br>non-RPE                       | 16H12_<br>iPSC | 16H12_<br>non-CM | 16H12_<br>RPE | 16H12_<br>non-<br>RPE | 16H12_<br>iPSC                                                                                                                                             | 16H12_<br>non-CM                                                                                                                                                         | 16H12_<br>non-RPE                                                                                                                                                        | 16H12_<br>iPSC     | 16H12_<br>non-CM   | 16H12_<br>RPE |
|-----------------------------------------|-----------------------------------------|-----------------------------------------|----------------|------------------|---------------|-----------------------|------------------------------------------------------------------------------------------------------------------------------------------------------------|--------------------------------------------------------------------------------------------------------------------------------------------------------------------------|--------------------------------------------------------------------------------------------------------------------------------------------------------------------------|--------------------|--------------------|---------------|
| 1                                       | 1                                       | 1                                       | 3              | 3                | 3             | 3                     | 3                                                                                                                                                          | 3                                                                                                                                                                        | 4                                                                                                                                                                        | 1                  | 1                  | 1             |
| Loss                                    | Loss                                    | Loss                                    | Gain           | Gain             | Gain          | Gain                  | Gain                                                                                                                                                       | Gain                                                                                                                                                                     | Gain                                                                                                                                                                     | Loss               | Loss               | Loss          |
| 1                                       | 1                                       | 1                                       | 15             | 15               | 15            | 15                    | 17                                                                                                                                                         | 17                                                                                                                                                                       | 17                                                                                                                                                                       | 19                 | 19                 | 19            |
| q44                                     | q44                                     | q44                                     | q22.2          | q22.2            | q22.2         | q22.2                 | q12                                                                                                                                                        | q12                                                                                                                                                                      | q12                                                                                                                                                                      | p12                | p12                | p12           |
| 105.85                                  | 105.85                                  | 105.85                                  | 136.79         | 132.175          | 128.361       | 127.352               | 367.77                                                                                                                                                     | 369.636                                                                                                                                                                  | 367.77                                                                                                                                                                   | 127.394            | 127.394            | 120.184       |
| 56                                      | 56                                      | 56                                      | 184            | 168              | 166           | 162                   | 64                                                                                                                                                         | 68                                                                                                                                                                       | 64                                                                                                                                                                       | 88                 | 88                 | 84            |
| 4                                       | 4                                       | 4                                       | 1              | 1                | 1             | 1                     | 14                                                                                                                                                         | 14                                                                                                                                                                       | 14                                                                                                                                                                       | 2                  | 2                  | 1             |
| OR2T29,<br>OR2T34,<br>OR2T10,<br>OR2T11 | OR2T29,<br>OR2T34,<br>OR2T10,<br>OR2T11 | OR2T29,<br>OR2T34,<br>OR2T10,<br>OR2T11 | RORA           | RORA             | RORA          | RORA                  | CCL4L1, CCL4L2,<br>CCL4, TBC1D3H,<br>TBC1D3I,<br>LOC101060389,<br>TBC1D3G,<br>TBC1D3L,<br>TBC1D3B,<br>CCL3L3, CCL3L1,<br>LOC440434,<br>TBC1D3K,<br>TBC1D3F | CCL4L1, CCL4L2,<br>CCL4L2, CCL4,<br>TBC1D3H,<br>TBC1D3I,<br>LOC101060389,<br>TBC1D3G,<br>TBC1D3L,<br>TBC1D3B,<br>CCL3L3,<br>CCL3L1,<br>LOC440434,<br>TBC1D3K,<br>TBC1D3F | CCL4L1, CCL4L2,<br>CCL4L2, CCL4,<br>TBC1D3H,<br>TBC1D3I,<br>LOC101060389,<br>TBC1D3G,<br>TBC1D3L,<br>TBC1D3B,<br>CCL3L3,<br>CCL3L1,<br>LOC440434,<br>TBC1D3K,<br>TBC1D3F | ZNF826P,<br>ZNF737 | ZNF826P,<br>ZNF737 | ZNF826P       |



## H CNVs detected in 15M38-iPSCs and their derivatives

### CNVs observed only in iPSCs

| File            | 15M38_<br>iPSC                                                                                                                                                                                                                                                             | 15M38_<br>iPSC  | 15M38_<br>iPSC | 15M38_<br>iPSC | 15M38_<br>iPSC                  | 15M38_<br>iPSC                                                                                                                                                                                                                                                                                                                                          | 15M38_<br>iPSC                               |
|-----------------|----------------------------------------------------------------------------------------------------------------------------------------------------------------------------------------------------------------------------------------------------------------------------|-----------------|----------------|----------------|---------------------------------|---------------------------------------------------------------------------------------------------------------------------------------------------------------------------------------------------------------------------------------------------------------------------------------------------------------------------------------------------------|----------------------------------------------|
| <b>CN State</b> | <b>2.2260864</b>                                                                                                                                                                                                                                                           | <b>3</b>        | <b>3</b>       | <b>3</b>       | <b>3</b>                        | <b>1.7444303</b>                                                                                                                                                                                                                                                                                                                                        | <b>1</b>                                     |
| Type            | GainMosaic                                                                                                                                                                                                                                                                 | Gain            | Gain           | Gain           | Gain                            | LossMosaic                                                                                                                                                                                                                                                                                                                                              | Loss                                         |
| Chromosome      | 3                                                                                                                                                                                                                                                                          | 3               | 4              | 4              | 7                               | 12                                                                                                                                                                                                                                                                                                                                                      | 16                                           |
| Cytoband Start  | p14.2                                                                                                                                                                                                                                                                      | p14.1           | q13.1          | q22.1          | q31.32                          | q24.32                                                                                                                                                                                                                                                                                                                                                  | p11.2                                        |
| Size (kbp)      | 4599.826                                                                                                                                                                                                                                                                   | 126.4           | 269.475        | 117.186        | 265                             | 4727.405                                                                                                                                                                                                                                                                                                                                                | 389.539                                      |
| Marker Count    | 4954                                                                                                                                                                                                                                                                       | 60              | 268            | 104            | 498                             | 4892                                                                                                                                                                                                                                                                                                                                                    | 52                                           |
| Gene Count      | 27                                                                                                                                                                                                                                                                         | 1               | 1              | 1              | 3                               | 30                                                                                                                                                                                                                                                                                                                                                      | 4                                            |
| Genes           | <i>PTPRG, PTPRG-AS1, C3orf14, FEZF2, CADPS, LINC00698, SYNPR, SYNPR-AS1, SNTN, C3orf49, THOC7, THOC7-AS1, ATXN7, PSMD6-AS2, PSMD6, PRICKLE2-AS1, LINC00994, PRICKLE2, PRICKLE2-AS2, PRICKLE2-AS3, ADAMTS9, ADAMTS9-AS1, ADAMTS9-AS2, MAGI1, MAGI1-AS1, SLC25A26, LRIG1</i> | <i>SLC25A26</i> | <i>ADGRL3</i>  | <i>GRID2</i>   | <i>FEZF1, FEZF1-AS1, CADPS2</i> | <i>LINC00939, LOC101927464, LOC100128554, LOC100996671, LINC00944, LINC00943, LOC440117, LOC101927592, LOC101927616, LOC101927637, LOC105370068, FLJ37505, LINC00508, LINC00507, GRAT8, LOC100996679, LOC101927694, MIR4419B, TMEM132C, MIR3612, SLC15A4, GLT1D1, TMEM132D, LOC283352, LOC101927735, LOC100190940, FZD10-AS1, FZD10, PIWIL1, RIMBP2</i> | <i>TP53TG3B, TP53TG3, TP53TG3C, SLC6A10P</i> |

## H CNVs detected in 15M38-iPSCs and their derivatives

Sample from transplant  Copy number = 4

### CNVs observed only in iPSCs

| File           | 15M38_<br>non-RPE | 15M38_<br>non-HCM<br>+ G1                        | 15M38_<br>non-CM         | 15M38_<br>non-CM                                       | 15M38_<br>non-HCM<br>+ G1      | 15M38_<br>RPE<br>+ G1 | 15M38_<br>RPE<br>+ G1                          | 15M38_<br>non-CM      | 15M38_<br>RPE<br>+ G1 | 15M38_<br>RPE<br>+ G1 |
|----------------|-------------------|--------------------------------------------------|--------------------------|--------------------------------------------------------|--------------------------------|-----------------------|------------------------------------------------|-----------------------|-----------------------|-----------------------|
| CN State       | 1                 | 1                                                | 3                        | 3                                                      | 1                              | 1                     | 1                                              | 3                     | 3                     | 0                     |
| Type           | Loss              | Loss                                             | Gain                     | Gain                                                   | Loss                           | Loss                  | Loss                                           | Gain                  | Gain                  | Loss                  |
| Chromosome     | 4                 | 6                                                | 8                        | 11                                                     | 11                             | 11                    | 12                                             | 22                    | 22                    | Y                     |
| Cytoband Start | q13.2             | q21                                              | p11.22                   | q11                                                    | q23.2                          | q11                   | q23.3                                          | q12.3                 | q11.22                | q11.223               |
| Size (kbp)     | 106.075           | 220.037                                          | 167.46                   | 141.18                                                 | 227.895                        | 159.493               | 371.55                                         | 141.39                | 176.119               | 295.853               |
| Marker Count   | 52                | 248                                              | 88                       | 160                                                    | 224                            | 82                    | 380                                            | 152                   | 96                    | 60                    |
| Gene Count     | 1                 | 4                                                | 2                        | 5                                                      | 3                              | 1                     | 4                                              | 2                     | 1                     | 2                     |
| Genes          | <i>UGT2B15</i>    | <i>FLJ34503, HDAC2,<br/>LOC101927768, HS3ST5</i> | <i>ADAM5,<br/>ADAM3A</i> | <i>OR4C16,<br/>OR4C11,<br/>OR4P4,<br/>OR4S2, OR4C6</i> | <i>REXO2,<br/>NXPE1, NXPE4</i> | <i>TRIM48</i>         | <i>TCP11L2, POLR3B,<br/>LOC100287944, RFX4</i> | <i>ISX, LINC01399</i> | <i>MIR650</i>         | <i>TTY3B, TTTY3</i>   |

## H CNVs detected in 15M38-iPSCs and their derivatives

Sample from transplant

Copy number = 4

### CNVs observed before and after differentiation

| File              | 15M38_<br>iPSC | 15M38_<br>non-CM | 15M38_<br>non HCM<br>+ G1 | 15M38_<br>RPE | 15M38_<br>RPE<br>+ G1 | 15M38_<br>non-RPE | 15M38_<br>non-RPE<br>+ G1 | 15M38_<br>iPSC      | 15M38_<br>non-CM    | 15M38_<br>non HCM<br>+ G1 | 15M38_<br>RPE       | 15M38_<br>RPE<br>+ G1 | 15M38_<br>non-RPE   | 15M38_<br>non-RPE<br>+ G1 | 15M38_<br>iPSC     | 15M38_<br>non-CM               | 15M38_<br>non-HCM<br>+ G1 | 15M38_<br>RPE      | 15M38_<br>RPE<br>+ G1 | 15M38_<br>non-RPE              | 15M38_<br>non-RPE<br>+ G1                                                        |
|-------------------|----------------|------------------|---------------------------|---------------|-----------------------|-------------------|---------------------------|---------------------|---------------------|---------------------------|---------------------|-----------------------|---------------------|---------------------------|--------------------|--------------------------------|---------------------------|--------------------|-----------------------|--------------------------------|----------------------------------------------------------------------------------|
| CN State          | 3              | 4                | 3                         | 3             | 3                     | 3                 | 3                         | 3                   | 3                   | 3                         | 3                   | 3                     | 3                   | 4                         | 3                  | 4                              | 4                         | 4                  | 3                     | 3                              |                                                                                  |
| Type              | Gain           | Gain             | Gain                      | Gain          | Gain                  | Gain              | Gain                      | Gain                | Gain                | Gain                      | Gain                | Gain                  | Gain                | Gain                      | Gain               | Gain                           | Gain                      | Gain               | Gain                  | Gain                           |                                                                                  |
| Chromosome        | 5              | 5                | 5                         | 5             | 5                     | 5                 | 5                         | 13                  | 13                  | 13                        | 13                  | 13                    | 13                  | 14                        | 14                 | 14                             | 14                        | 14                 | 14                    | 14                             |                                                                                  |
| Cytoband<br>Start | q35.3          | q35.3            | q35.3                     | q35.3         | q35.3                 | q35.3             | q35.3                     | q12.12              | q12.12              | q12.12                    | q12.12              | q12.12                | q12.12              | q12.12                    | q32.33             | q32.33                         | q32.33                    | q32.33             | q32.33                | q32.33                         |                                                                                  |
| Size (kbp)        | 180.293        | 176.696          | 219.303                   | 219.303       | 180.377               | 201.787           | 194.182                   | 199.759             | 199.759             | 207.491                   | 199.759             | 207.617               | 202.627             | 202.627                   | 407.886            | 485.71                         | 407.886                   | 407.886            | 407.886               | 478.353                        | 509.742                                                                          |
| Marker Count      | 111            | 109              | 124                       | 124           | 112                   | 123               | 115                       | 288                 | 288                 | 292                       | 288                 | 293                   | 291                 | 291                       | 56                 | 164                            | 56                        | 56                 | 56                    | 156                            | 177                                                                              |
| Gene Count        | 1              | 1                | 1                         | 1             | 1                     | 1                 | 1                         | 2                   | 2                   | 2                         | 2                   | 2                     | 2                   | 2                         | 2                  | 6                              | 2                         | 2                  | 2                     | 6                              | 7                                                                                |
| Genes             | ADAMTS2        | ADAMTS2          | ADAMTS2                   | ADAMTS2       | ADAMTS2               | ADAMTS2           | ADAMTS2                   | SPATA13,<br>MIR2276 | SPATA13,<br>MIR2276 | SPATA13,<br>MIR2276       | SPATA13,<br>MIR2276 | SPATA13,<br>MIR2276   | SPATA13,<br>MIR2276 | SPATA13,<br>MIR2276       | KIAA0125,<br>ADAM6 | MIR4538,<br>KIAA0125,<br>ADAM6 | KIAA0125,<br>ADAM6        | KIAA0125,<br>ADAM6 | KIAA0125,<br>ADAM6    | MIR4538,<br>KIAA0125,<br>ADAM6 | MIR4539,<br>MIR4507,<br>MIR4538,<br>MIR4537,<br>KIAA0125,<br>ADAM6,<br>LINC00226 |

Fig. S4. A: CNVs detected in Ff-WJ14s01-iPSCs and their derivatives. B: CNVs detected in 1210B2-iPSCs and their derivatives. C: CNVs detected in Ff-I01-iPSCs and their derivatives. D: CNVs detected in H9-ESCs and their derivatives. E: CNVs detected in 16E84-iPSCs and their derivatives. F: CNVs detected in 16E85-iPSCs and their derivatives. G: CNVs detected in 16H12-iPSCs and their derivatives. H: CNVs detected in 15M38-iPSCs and their derivatives.

Fig.S5.

## 14q32.33

| Sample name    | Probe ID | Copies/30 ng DNA |           | CN    |
|----------------|----------|------------------|-----------|-------|
|                |          | Target           | reference |       |
| 16E84 iPSC     | 4868     | 60200            | 13740     | 8.77  |
| 16E84 RPEs     | 4868     | 26280            | 4340      | 12.1  |
| 16E84 non-RPEs | 4868     | 26520            | 4300      | 12.3  |
| 16E84 CMs      | 4868     | 26940            | 3960      | 13.6  |
| 16E84 non-CMs  | 4868     | 30380            | 4180      | 14.5  |
| 16E85 iPSC     | 4868     | 77200            | 17960     | 8.6   |
| 16E85 RPEs     | 4868     | 30220            | 5060      | 11.96 |
| 16E85 non-RPEs | 4868     | 19980            | 3100      | 12.9  |
| 16E85 CMs      | 4868     | 50000            | 14240     | 7.04  |
| 16E85 non-CMs  | 4868     | 48500            | 12980     | 7.47  |
| 16H12 iPSC     | 4868     | 10260            | 8480      | 2.42  |
| 16H12 RPEs     | 4868     | 5520             | 3740      | 2.95  |
| 16H12 non-RPEs | 4868     | 4740             | 3180      | 2.97  |
| 16H12 non-CMs  | 4868     | 12720            | 11780     | 2.16  |
| 15M38 iPSC     | 4868     | 35040            | 13680     | 5.12  |
| 15M38 RPEs     | 4868     | 10800            | 2800      | 7.69  |
| 15M38 non-RPEs | 4868     | 10640            | 3100      | 6.87  |
| 15M38 CMs      | 4868     | 30400            | 7660      | 7.94  |
| H9 ESC         | 4868     | 12200            | 14320     | 1.7   |
| H9 RPEs        | 4868     | 2840             | 3100      | 1.83  |
| H9 non-RPEs    | 4868     | 3180             | 3480      | 1.83  |
| H9 CMs         | 4868     | 7340             | 8120      | 1.8   |
| H9 non-CMs     | 4868     | 7740             | 15700     | 0.986 |

## 17q12

| Sample name    | Probe ID | Copies/30 ng DNA |           | CN   |
|----------------|----------|------------------|-----------|------|
|                |          | Target           | reference |      |
| 16E84 iPSC     | 8378     | 20840            | 12280     | 3.4  |
| 16E84 RPEs     | 8378     | 8220             | 4160      | 3.96 |
| 16E84 non-RPEs | 8378     | 7660             | 3920      | 3.91 |
| 16E84 CMs      | 8378     | 8340             | 4180      | 3.99 |
| 16E84 non-CMs  | 8378     | 8520             | 4180      | 4.08 |
| 16E85 iPSC     | 8378     | 29200            | 17440     | 3.35 |
| 16E85 RPEs     | 8378     | 9020             | 4700      | 3.85 |
| 16E85 non-RPEs | 8378     | 5760             | 2940      | 3.91 |
| 16E85 CMs      | 8378     | 16100            | 14560     | 2.21 |
| 16E85 non-CMs  | 8378     | 15140            | 13520     | 2.24 |
| 16H12 iPSC     | 8378     | 14480            | 8240      | 3.52 |
| 16H12 RPEs     | 8378     | 7640             | 3920      | 3.9  |
| 16H12 non-RPEs | 8378     | 6500             | 3220      | 4.03 |
| 16H12 non-CMs  | 8378     | 17480            | 12040     | 2.9  |
| 15M38 iPSC     | 8378     | 12540            | 13780     | 1.82 |
| 15M38 RPEs     | 8378     | 3100             | 2800      | 2.21 |
| 15M38 non-RPEs | 8378     | 2860             | 3120      | 1.83 |
| 15M38 CMs      | 8378     | 8320             | 8280      | 2.01 |
| H9 ESC         | 8378     | 19740            | 14820     | 2.66 |
| H9 RPEs        | 8378     | 4620             | 3180      | 2.89 |
| H9 non-RPEs    | 8378     | 5120             | 3660      | 2.8  |
| H9 CMs         | 8378     | 10520            | 8060      | 2.61 |
| H9 non-CMs     | 8378     | 11680            | 15340     | 1.52 |

| Cytoband | Taqman Probe  |
|----------|---------------|
| 14q32.33 | Hs03124868_cn |
| 17q12    | Hs03958378_cn |

Fig. S5. CNs detected at 14q32.33 or 17q12 by ddPCR. CN: copy number. The ribonuclease P RNA component *H1* gene (*RPPH1*) on Chr. 14q11.2 was used as a stable control for diploid copies (two copy control, CN = 2). The target locus in 14q32.33 was Chr.14:106260714, and that in 17q12 was Chr.17:36120285 on GRCh38. The amplicon lengths were approximately 100 bp. Samples with a copy number greater than 3 are highlighted in yellow.
